# Supplementary material for: Synergistic photoredox and tertiary amine catalysis: generation of allylic sulfones from Morita–Baylis–Hillman acetates and sulfur dioxide
Source: Royal Society of Chemistry journal article supplement (doi:10.1039/d1qo00344e), 2021-01-01

# Synergistic Photoredox and Tertiary Amine Catalysis: Generation of Allylic Sulfones from Morita-Baylis-Hillman Acetates and Sulfur Dioxide

Xinhua Wang, Ruixiu Liu, Qiuping Ding, Wei Xiao\* and Jie Wu\*

## Supporting Information

### Table of Content

|                                                                                                                                                                                               |     |
|-----------------------------------------------------------------------------------------------------------------------------------------------------------------------------------------------|-----|
| 1. General methods.....                                                                                                                                                                       | S2  |
| 2. General procedure for the preparation of MBH acetates .....                                                                                                                                | S2  |
| 3. General procedure for the preparation of 4-substituted Hantzsch esters.....                                                                                                                | S3  |
| 4. Condition optimization for synergistic photoredox and tertiary amine catalyzed reaction of MBH acetate 1a, 4-substituted Hantzsch ester 2a and DABCO·(SO <sub>2</sub> ) <sub>2</sub> ..... | S3  |
| 5. General procedure for the synergistic photoredox and tertiary amine catalyzed reaction.....                                                                                                | S4  |
| 6. Synergistic photoredox and tertiary amine catalyzed reaction with linear MBH acetates.....                                                                                                 | S11 |
| 7. Condition optimization of synergistic photoredox and tertiary amine catalyzed reaction with inorganic sulfites as the source of sulfonyl group .....                                       | S11 |
| 8. Condition optimization for asymmetric synergistic photoredox and tertiary amine catalyzed reaction of MBH acetate.....                                                                     | S12 |
| 9. HRMS spectrum of captured intermediate A .....                                                                                                                                             | S14 |
| 10. Crystal data and structural refinement for 3j .....                                                                                                                                       | S14 |
| 11. NMR spectra and HPLC chromatograph.....                                                                                                                                                   | S16 |

## 1. General methods

NMR data were obtained for  $^1\text{H}$  at 400 MHz, and for  $^{13}\text{C}$  at 100 MHz. Chemical shifts were given in parts per million ( $\delta$ ) from tetramethylsilane with the solvent resonance as the internal standard in  $\text{CDCl}_3$  solution. ESI-HRMS was recorded on a Waters SYNAPT G2. Column chromatography was performed on silica gel (300-400 mesh) eluting with ethyl acetate and petroleum ether. TLC was performed on glass-backed silica plates. UV light,  $\text{I}_2$ , and a solution of potassium permanganate were used to visualize products. All chemicals were used without purification as commercially available unless otherwise noted. Experiments involving moisture and/or air sensitive components were performed under glovebox. Dried solvents and liquid reagents were degassed before use and transferred by oven-dried syringes.

## 2. General procedure for the preparation of MBH acetates

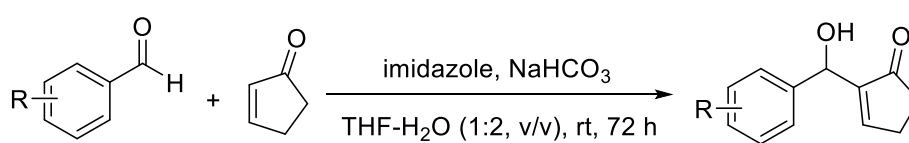

To a solution of aromatic aldehyde (14.4 mmol), imidazole (12 mmol) and  $\text{NaHCO}_3$  (38.4 mmol) in THF (19.2 mL) and water (38.4 mL) was added cyclopentenone (12 mmol) at room temperature. After full conversion, the reaction was quenched by 1M HCl and washed with EtOAc. The organic phase was dried over  $\text{Na}_2\text{SO}_4$  and concentrated in vacuo. The crude residue was purified by column chromatography (*n*-hexane/EtOAc) affording MBH alcohol product.<sup>1</sup>

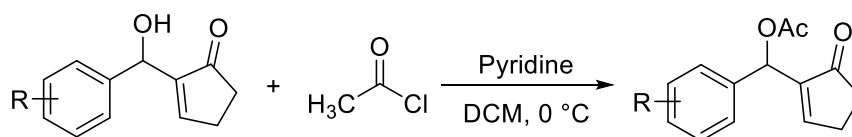

To a solution of MBH alcohol (5 mmol) in DCM (30 mL) was added pyridine (6.5 mmol) and  $\text{AcCl}$  (6.5 mmol) at  $0\text{ }^\circ\text{C}$ . After full conversion (TLC monitoring), the reaction mixture was quenched by addition of 1M HCl, extracted with DCM. The organic layer was washed with saturated brine, dried over  $\text{MgSO}_4$ , filtered and purified on silica gel affording the desired MBH acetate.<sup>1</sup>

### 3. General procedure for the preparation of 4-substituted Hantzsch esters

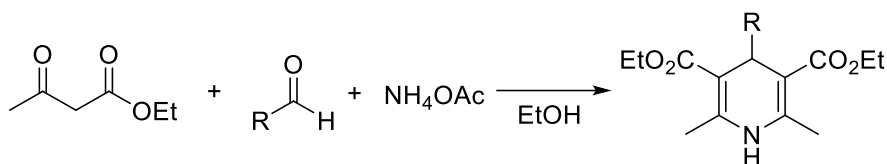

To a 250 mL round bottomed flask was charged ethyl acetoacetate (50 mmol), aldehyde (25 mmol), ammonium acetate (25 mmol) and ethanol (30 mL). The mixture was then heated to reflux overnight before being allowed to return to room temperature and concentrated in vacuo. The crude residue was diluted in  $\text{CH}_2\text{Cl}_2$ , washed with saturated brine. The organic phase was extracted with EtOAc, dried over  $\text{MgSO}_4$  and concentrated in vacuo. The crude residue was then purified via silica gel column chromatography (EtOAc:pentane - 20:80 v:v) to give the desired 3-substituted Hantzsch ester.<sup>2</sup>

1 M. Kamlar, S. Hybelbauerová, I. Císařová and J. Veselý, Organocatalytic enantioselective allylic alkylation of MBH carbonates with  $\beta$ -keto esters, *Org. Biomol. Chem.* 2014, **12**, 5071.

2 T. Rossolini, J. A. Leitch, R. Grainger and D. J. Dixon, Photocatalytic Three-Component Umpolung Synthesis of 1,3-Diamines, *Org. Lett.* 2018, **20**, 6794.

### 4. Condition optimization for synergistic photoredox and tertiary amine catalyzed reaction of MBH acetate **1a**, 4-substituted Hantzsch ester **2a** and $\text{DABCO}\cdot(\text{SO}_2)_2$ .<sup>a</sup>

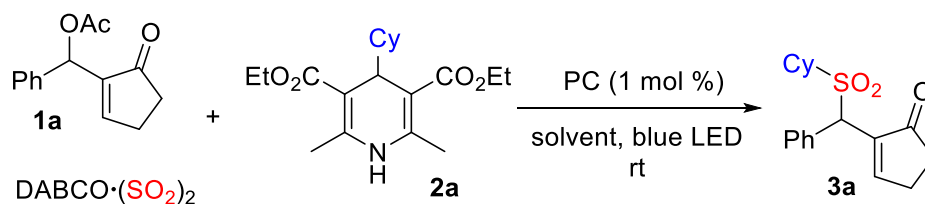

| entry | Photocatalyst                        | Solvent | Yield <sup>b</sup> (%) |
|-------|--------------------------------------|---------|------------------------|
| 1     | 4-CzIPN                              | DCE     | 51                     |
| 2     | Rhodamine-6G                         | DCE     | 46                     |
| 3     | $\text{Ru}(\text{bpy})_3\text{Cl}_2$ | DCE     | 24                     |
| 4     | Eosin Y                              | DCE     | 34                     |

|                       |                      |             |           |
|-----------------------|----------------------|-------------|-----------|
| 5                     | Fluorescein          | DCE         | 31        |
| 6                     | Mes-Acr <sup>+</sup> | DCE         | 46        |
| 7 <sup>c</sup>        | 4-CzIPN              | DCE         | 62        |
| 8 <sup>c</sup>        | 4-CzIPN              | EtOAc       | 70        |
| 9 <sup>c</sup>        | 4-CzIPN              | MeCN        | 70        |
| 10 <sup>c</sup>       | 4-CzIPN              | Toluene     | 64        |
| <b>11<sup>c</sup></b> | <b>4-CzIPN</b>       | <b>THF</b>  | <b>85</b> |
| 12 <sup>c</sup>       | 4-CzIPN              | 1,4-Dioxide | 74        |
| 13 <sup>c</sup>       | 4-CzIPN              | DMSO        | 18        |
| 14 <sup>c</sup>       | 4-CzIPN              | MeOH        | 44        |

<sup>a</sup>Reaction conditions: MBH acetate **1a** (0.1 mmol), 4-substituted Hantzsch ester **2a** (0.1 mmol), DABCO·(SO<sub>2</sub>)<sub>2</sub> (0.1 mmol), photocatalyst (0.001 mmol), solvent (1.0 mL), blue LED, rt, 48 h, under a N<sub>2</sub> atmosphere. <sup>b</sup>Isolated yield based on MBH acetate **1a**. <sup>c</sup>In the presence of 4-substituted Hantzsch ester **2a** (0.15 mmol).

## 5. General procedure for the synergistic photoredox and tertiary amine catalyzed reaction

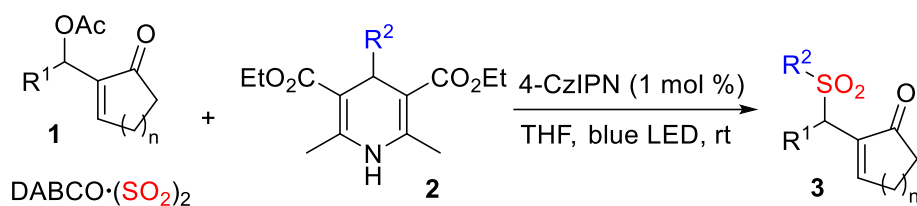

In glovebox, MBH acetate **1** (0.1 mmol), 4-substituted Hantzsch ester **2** (0.15 mmol), DABCO·(SO<sub>2</sub>)<sub>2</sub> (0.1 mmol), 4-CzIPN (0.001 mmol) were added into a tube equipped with a magnetic stir bar. Then, THF (1.0 mL) was added and the mixture was stirred at room temperature for 48 h under blue LED irradiation. After completion, the resulting crude residue was concentrated in vacuum and purified by column chromatography on silica gel eluting with (EtOAc/*n*-hexane) to afford product **3**.

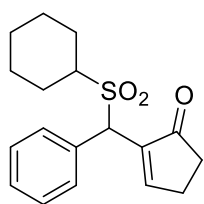

**2-((Cyclohexylsulfonyl)(phenyl)methyl)cyclopent-2-en-1-one (3a)**, white solid, 85% yield; 33% ee, determined by HPLC analysis: [Daicel chiralpak ID, *n*-hexane/*i*-PrOH = 80/20, 1.0 mL/min,  $\lambda$  = 206 nm, *t* (major) = 27.983 min, *t* (minor) = 35.90 min];  $^1\text{H}$  NMR (400 MHz,  $\text{CDCl}_3$ ):  $\delta$  (ppm) 8.30 (s, 1H), 7.55–7.53 (m, 2H), 7.41–7.37 (m, 3H), 5.38 (s, 1H), 2.84–2.66 (m, 3H), 2.44 (ddd,  $J$  = 44.8, 19.2, 6.4 Hz, 2H), 2.10 (dd,  $J$  = 45.2, 12.8 Hz, 2H), 1.87 (s, 2H), 1.64–1.49 (m, 3H), 1.23–1.09 (m, 3H);  $^{13}\text{C}$  NMR (100 MHz,  $\text{CDCl}_3$ ):  $\delta$  (ppm) 206.7, 162.7, 138.5, 131.8, 129.7, 129.0, 59.4, 59.0, 33.4, 27.4, 25.6, 25.0, 25.0, 24.9, 24.3; ESI-HRMS: calcd. for  $\text{C}_{18}\text{H}_{22}\text{O}_3\text{S}+\text{Na}^+$ : 341.1187, found: 341.1196.

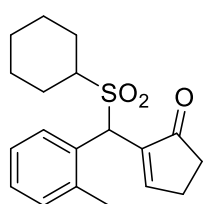

**2-((Cyclohexylsulfonyl)(o-tolyl)methyl)cyclopent-2-en-1-one (3b)**, yellow oil, 96% yield;  $^1\text{H}$  NMR (400 MHz,  $\text{CDCl}_3$ ):  $\delta$  (ppm) 8.26 (t,  $J$  = 2.4 Hz, 1H), 7.73–7.69 (m, 1H), 7.25–7.19 (m, 3H), 5.73 (s, 1H), 2.85–2.66 (m, 3H), 2.54–2.36 (m, 5H), 2.11 (t,  $J$  = 14.8 Hz, 2H), 1.90–1.87 (m, 2H), 1.67 (d,  $J$  = 3.2 Hz, 1H), 1.57–1.51 (m, 1H),

1.22–1.16 (m, 3H);  $^{13}\text{C}$  NMR (100 MHz,  $\text{CDCl}_3$ ):  $\delta$  (ppm) 206.9, 163.3, 139.7, 137.9, 130.9, 129.9, 129.0, 128.8, 126.5, 60.2, 54.2, 33.5, 27.5, 25.5, 25.1, 25.0, 24.7, 120.0; ESI-HRMS: calcd. for  $\text{C}_{19}\text{H}_{24}\text{O}_3\text{S}+\text{Na}^+$ : 355.1344, found: 355.1350.

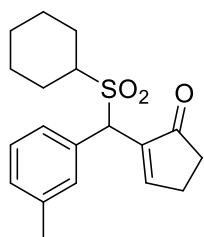

**2-((Cyclohexylsulfonyl)(m-tolyl)methyl)cyclopent-2-en-1-one (3c)**, yellow oil, 94% yield;  $^1\text{H}$  NMR (400 MHz,  $\text{CDCl}_3$ ):  $\delta$  (ppm) 8.29 (t,  $J$  = 2.4 Hz, 1H), 7.34 (d,  $J$  = 8.0 Hz, 2H), 7.28–7.25 (m, 1H), 7.17 (d,  $J$  = 7.2 Hz, 1H), 5.34 (s, 1H), 2.84–2.66 (m, 3H), 2.53–2.39 (m, 2H), 2.36 (s, 3H), 2.17–2.05 (m, 2H), 1.88–1.85 (m, 2H), 1.66–1.64

(m, 1H), 1.60–1.51 (m, 2H), 1.22–1.12 (m, 3H);  $^{13}\text{C}$  NMR (100 MHz,  $\text{CDCl}_3$ ):  $\delta$  (ppm) 206.8, 162.8, 138.8, 138.6, 131.7, 130.3, 129.9, 128.9, 126.8, 59.3, 58.9, 33.5, 27.4, 25.6, 25.1, 25.0, 24.9, 24.3, 21.5; ESI-HRMS: calcd. for  $\text{C}_{19}\text{H}_{24}\text{O}_3\text{S}+\text{Na}^+$ : 355.1344, found: 355.1346.

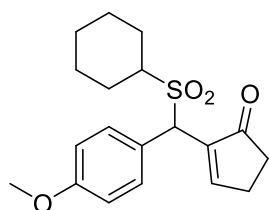

**2-((Cyclohexylsulfonyl)(4-methoxyphenyl)methyl)cyclopent-2-en-1-one**

**(3d)**, yellow solid, 70% yield;  $^1\text{H}$  NMR (400 MHz,  $\text{CDCl}_3$ ):  $\delta$  (ppm) 8.28 (s, 1H), 7.44 (d,  $J$  = 8.8 Hz, 2H), 6.90 (d,  $J$  = 8.8 Hz, 2H), 5.33 (s, 1H), 3.81 (s, 3H), 2.84–2.67 (m, 3H), 2.44 (ddd,  $J$  = 43.6, 19.2, 2.0 Hz, 2H), 2.09 (dd,  $J$  = 43.2,

12.8 Hz, 2H), 1.88 (s, 2H), 1.64–1.49 (m, 3H), 1.21–1.10 (m, 3H);  $^{13}\text{C}$  NMR (100 MHz,  $\text{CDCl}_3$ ):  $\delta$  (ppm)

206.9, 162.4, 160.1, 138.8, 131.0, 123.5, 114.5, 59.0, 58.3, 55.3, 33.5, 27.4, 25.6, 25.1, 25.0, 24.9, 24.2; ESI-HRMS: calcd. for  $C_{19}H_{24}O_4S+Na^+$ : 371.1293, found: 371.1299.

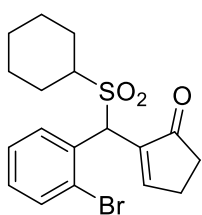

**2-((2-Bromophenyl)(cyclohexylsulfonyl)methyl)cyclopent-2-en-1-one (3e),**

colourless oil, 51% yield;  $^1H$  NMR (400 MHz,  $CDCl_3$ ):  $\delta$  (ppm) 8.14 (t,  $J = 2.8$  Hz, 1H), 7.86 (dd,  $J = 7.6, 1.6$  Hz, 1H), 7.62 (dd,  $J = 8.4, 1.6$  Hz, 1H), 7.37 (td,  $J = 7.6, 1.2$  Hz, 1H), 7.22 (td,  $J = 8.0, 1.6$  Hz, 1H), 6.13 (s, 1H), 2.85–2.65 (m, 3H), 2.47 (qdd,  $J = 19.2, 6.8, 2.4$  Hz, 2H), 2.28–2.10 (m, 2H), 1.89–1.87 (m, 2H), 1.68–1.66 (m, 1H), 1.59–1.51 (m, 2H), 1.24–1.17 (m, 3H);  $^{13}C$  NMR (100 MHz,  $CDCl_3$ ):  $\delta$  (ppm) 206.3, 163.6, 138.9, 133.5, 131.8, 130.9, 130.3, 127.9, 125.9, 60.7, 57.6, 33.5, 27.5, 25.3, 25.2, 25.1, 25.0; ESI-HRMS: calcd. for  $C_{18}H_{21}Br^{79}O_3S+Na^+$ : 419.0292, found: 419.0292;  $C_{18}H_{21}Br^{81}O_3S+Na^+$ : 421.0272, found: 421.0276.

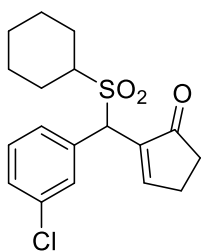

**2-((3-Chlorophenyl)(cyclohexylsulfonyl)methyl)cyclopent-2-en-1-one (3f),** white

solid, 65% yield;  $^1H$  NMR (400 MHz,  $CDCl_3$ ):  $\delta$  (ppm) 8.29 (t,  $J = 2.8$  Hz, 1H), 7.52 (d,  $J = 2.0$  Hz, 1H), 7.42 (dt,  $J = 7.6, 1.6$  Hz, 1H), 7.37–7.30 (m, 2H), 5.33 (s, 1H), 2.86–2.68 (m, 3H), 2.46 (qdd,  $J = 19.6, 6.4, 2.4$  Hz, 2H), 2.16–2.05 (m, 2H), 1.89–1.88 (m, 2H), 1.67 (dd,  $J = 6.0, 4.4$  Hz, 1H), 1.58–1.51 (m, 2H), 1.22–1.15 (m, 3H);  $^{13}C$  NMR (100 MHz,  $CDCl_3$ ):  $\delta$  (ppm) 206.6, 163.1, 138.2, 134.9, 133.6, 130.2, 129.7, 129.3, 128.1, 59.7, 58.4, 33.4, 27.5, 25.4, 25.0, 25.0, 24.5; ESI-HRMS: calcd. for  $C_{18}H_{21}Cl^{35}O_3S+Na^+$ : 375.0798, found: 375.0806;  $C_{18}H_{21}Cl^{37}O_3S+Na^+$ : 377.0768, found: 377.0775.

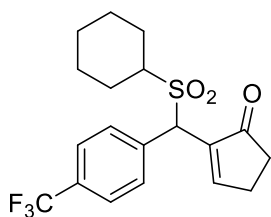

**2-((Cyclohexylsulfonyl)(4-(trifluoromethyl)phenyl)methyl)cyclopent-2-en-**

**1-one (3g),** colourless oil, 61% yield;  $^1H$  NMR (400 MHz,  $CDCl_3$ ):  $\delta$  (ppm)

8.30 (t,  $J = 2.8$  Hz, 1H), 7.68–7.63 (m, 4H), 5.43 (s, 1H), 2.88–2.68 (m, 3H), 2.47 (qdd,  $J = 19.2, 6.4, 2.0$  Hz, 2H), 2.17–2.06 (m, 2H), 1.90 (d,  $J = 2.8$  Hz, 2H), 1.67–1.54 (m, 4H), 1.18–1.56 (m, 2H);  $^{13}C$  NMR (100 MHz,  $CDCl_3$ ):  $\delta$  (ppm) 206.6, 163.1, 138.2, 135.7, 131.2 (q,  $J = 32.6$  Hz), 130.2, 126.0 (q,  $J = 3.6$  Hz), 123.8 (q,  $J = 270.6$  Hz), 59.8, 58.4, 33.4, 27.5, 25.2, 25.0, 24.9, 24.9, 24.6; ESI-HRMS: calcd. for  $C_{19}H_{21}F_3O_3S+Na^+$ : 409.1061, found: 409.1064.

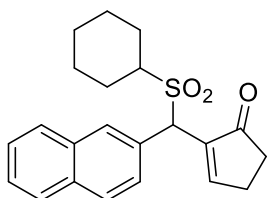

**2-((Cyclohexylsulfonyl)(naphthalen-2-yl)methyl)cyclopent-2-en-1-one (3h),**

yellow solid, 62% yield;  $^1\text{H}$  NMR (400 MHz,  $\text{CDCl}_3$ ):  $\delta$  (ppm) 8.38 (t,  $J = 2.4$  Hz, 1H), 8.00 (s, 1H), 7.88–7.83 (m, 3H), 7.67 (dd,  $J = 8.8, 1.6$  Hz, 1H), 7.54–7.50 (m, 2H), 5.56 (s, 1H), 2.87–2.68 (m, 3H), 2.45 (qdd,  $J = 19.2, 6.8, 2.0$  Hz, 2H),

2.21 (d,  $J = 12.4$  Hz, 1H), 2.07 (d,  $J = 12.8$  Hz, 1H), 1.85 (t,  $J = 11.2$  Hz, 2H), 1.67–1.54 (m, 4H), 1.17–1.09 (m, 2H);  $^{13}\text{C}$  NMR (100 MHz,  $\text{CDCl}_3$ ):  $\delta$  (ppm) 206.8, 162.8, 138.6, 133.3, 133.2, 129.5, 129.4, 129.0, 128.2, 127.7, 126.9, 126.6, 126.5, 59.4, 59.1, 33.5, 27.4, 25.7, 25.0, 24.9, 24.2; ESI-HRMS: calcd. for  $\text{C}_{18}\text{H}_{21}\text{ClO}_3\text{S}+\text{Na}^+$ : 391.1344, found: 391.1351.

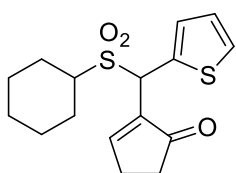

**2-((Cyclohexylsulfonyl)(thiophen-2-yl)methyl)cyclopent-2-en-1-one (3i),**

yellow oil, 32% yield;  $^1\text{H}$  NMR (400 MHz,  $\text{CDCl}_3$ ):  $\delta$  (ppm) 8.27 (t,  $J = 2.8$  Hz, 1H), 7.36 (d,  $J = 5.2$  Hz, 1H), 7.23 (d,  $J = 3.6$  Hz, 1H), 7.03 (dd,  $J = 5.2, 3.6$  Hz, 1H), 5.71 (s, 1H), 2.86–2.69 (m, 3H), 2.49 (qdd,  $J = 19.2, 6.4, 2.4$  Hz, 2H), 2.22–2.08

(m, 3H), 1.89–1.84 (m, 2H), 1.67 (d,  $J = 6.0$  Hz, 1H), 1.55–1.51 (m, 1H), 1.23–1.14 (m, 3H);  $^{13}\text{C}$  NMR (100 MHz,  $\text{CDCl}_3$ ):  $\delta$  (ppm) 206.3, 164.1, 138.3, 133.5, 129.3, 127.5, 127.2, 59.1, 54.3, 33.6, 27.4, 25.8, 25.1, 25.0, 24.9, 24.2; ESI-HRMS: calcd. for  $\text{C}_{16}\text{H}_{20}\text{O}_3\text{S}_2+\text{Na}^+$ : 347.0752, found: 347.0760.

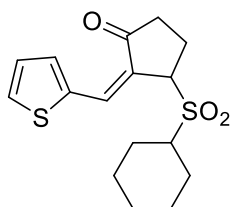

**3-(cyclohexylsulfonyl)-2-(thiophen-2-ylmethylene)cyclopentan-1-one (3i'),**

yellow solid, 40% yield;  $^1\text{H}$  NMR (400 MHz,  $\text{CDCl}_3$ ):  $\delta$  (ppm) 7.90 (s, 1H), 7.60 (d,  $J = 4.4$  Hz, 1H), 7.52 (d,  $J = 2.8$  Hz, 1H), 7.13 (t,  $J = 4$  Hz, 1H), 4.90 (d,  $J = 7.2$  Hz, 1H), 3.18–3.12 (m, 1H), 2.95–2.85 (m, 1H), 2.65 (dd,  $J = 14.0, 9.6$  Hz, 1H),

2.38 (dd,  $J = 18.4, 8.8$  Hz, 1H), 2.24 (d,  $J = 6.4$  Hz, 3H), 1.95 (s, 2H), 1.77–1.72 (m, 2H), 1.64–1.58 (m, 1H), 1.26–1.21 (m, 3H).  $^{13}\text{C}$  NMR (100 MHz,  $\text{CDCl}_3$ ):  $\delta$  (ppm) 204.0, 137.5, 136.0, 132.4, 131.7, 128.1, 124.9, 60.8, 59.8, 34.9, 26.2, 25.2, 25.1, 25.0, 24.5, 23.1. ESI-HRMS: calcd. For  $\text{C}_{16}\text{H}_{20}\text{O}_3\text{S}_2+\text{Na}^+$ : 347.0752, found: 347.0753.

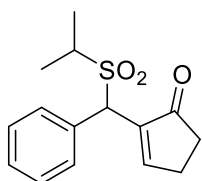

**2-((Isopropylsulfonyl)(phenyl)methyl)cyclopent-2-en-1-one (3j),** white solid, 77%

yield;  $^1\text{H}$  NMR (400 MHz,  $\text{CDCl}_3$ ):  $\delta$  (ppm) 8.30 (s, 1H), 7.56–7.54 (m, 2H), 7.41–7.37 (m, 3H), 5.41 (s, 1H), 3.01–2.94 (m, 1H), 2.85–2.67 (m, 2H), 2.50 (ddd,  $J = 42.8, 18.8, 6.8$  Hz, 2H), 1.37 (d,  $J = 6.8$  Hz, 3H), 1.31 (d,  $J = 6.8$  Hz, 3H);  $^{13}\text{C}$  NMR

(100 MHz, CDCl<sub>3</sub>):  $\delta$  (ppm) 206.8, 162.8, 138.5, 131.8, 129.7, 129.1, 59.1, 51.4, 33.4, 27.4, 15.8, 14.8; ESI-HRMS: calcd. for C<sub>15</sub>H<sub>18</sub>O<sub>3</sub>S+Na<sup>+</sup>: 301.0874, found: 301.0877.

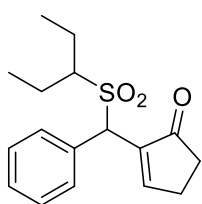

**2-((Pentan-3-ylsulfonyl)(phenyl)methyl)cyclopent-2-en-1-one (3k)**, yellow oil,

90% yield; <sup>1</sup>H NMR (400 MHz, CDCl<sub>3</sub>):  $\delta$  (ppm) 8.30 (s, 1H), 7.55–7.53 (m, 2H), 7.41–7.37 (m, 3H), 5.42 (s, 1H), 2.84–2.59 (m, 3H), 2.45 (ddd,  $J$  = 43.2, 19.2, 2.4 Hz, 2H), 1.98–1.71 (m, 4H), 0.98 (dd,  $J$  = 13.6, 7.6 Hz, 6H); <sup>13</sup>C NMR (100 MHz,

CDCl<sub>3</sub>):  $\delta$  (ppm) 206.8, 162.7, 138.6, 132.0, 129.8, 129.0, 129.0, 62.5, 60.2, 33.4, 27.4, 20.4, 19.5, 10.9, 10.8; ESI-HRMS: calcd. for C<sub>17</sub>H<sub>22</sub>O<sub>3</sub>S+Na<sup>+</sup>: 329.1187, found: 329.1189.

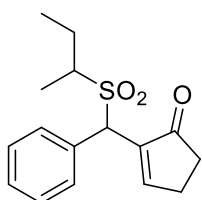

**2-((Sec-butylsulfonyl)(phenyl)methyl)cyclopent-2-en-1-one (3l)**, (dr : 1:1),

colourless oil, 90% yield; <sup>1</sup>H NMR (400 MHz, CDCl<sub>3</sub>):  $\delta$  (ppm) 8.30 (dt,  $J$  = 9.6, 2.4 Hz, 1H), 7.54 (td,  $J$  = 8.0, 2.4 Hz, 2H), 7.41–7.37 (m, 3H), 5.43 (d,  $J$  = 5.6 Hz, 1H), 2.85–2.66 (m, 3H), 2.54–2.35 (m, 2H), 2.09–1.95 (m, 1H), 1.59–1.53 (m, 1H), 1.32

(dd,  $J$  = 22.8, 6.8 Hz, 3H), 0.98–0.93 (m, 3H); <sup>13</sup>C NMR (100 MHz, CDCl<sub>3</sub>):  $\delta$  (ppm) 206.7, 206.7, 162.8, 162.7, 138.6, 138.4, 132.1, 131.6, 129.9, 129.7, 129.1, 129.1, 129.1, 129.0, 59.3, 59.3, 57.4, 57.3, 33.4, 33.4, 27.4, 27.4, 22.6, 21.5, 12.8, 11.7, 11.0, 10.9; ESI-HRMS: calcd. for C<sub>16</sub>H<sub>20</sub>O<sub>3</sub>S+Na<sup>+</sup>: 315.1031, found: 315.1029.

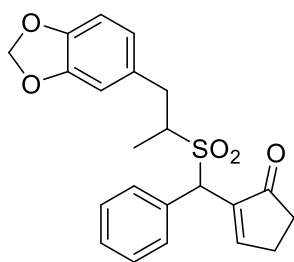

**2-(((4-(Benzo[d][1,3]dioxol-4-yl)butan-2-yl)sulfonyl)(phenyl)methyl)cyclopent-2-en-1-one (3m)**, (dr : 1:1), yellow oil, 50% yield; <sup>1</sup>H NMR (400 MHz,

CDCl<sub>3</sub>):  $\delta$  (ppm) 8.33–8.30 (m, 1H), 7.58–7.56 (m, 2H), 7.42–7.38 (m, 3H), 6.73–6.70 (m, 1H), 6.53–6.46 (m, 2H), 5.93–5.92 (m, 2H), 5.44 (d,  $J$  = 4.8 Hz, 1H), 3.35–3.26 (m, 1H), 3.02–2.94 (m, 1H), 2.86–2.68 (m, 2H), 2.56–

2.37 (m, 3H), 1.26–1.78 (m, 4H); <sup>13</sup>C NMR (100 MHz, CDCl<sub>3</sub>):  $\delta$  (ppm) 206.7, 206.6, 163.1, 163.0, 147.9, 147.9, 146.6, 146.6, 138.5, 138.4, 131.8, 131.7, 130.3, 130.2, 129.8, 129.7, 129.3, 129.2, 129.2, 129.2, 122.5, 122.4, 109.4, 109.3, 108.5, 108.4, 101.1, 101.0, 59.9, 59.8, 57.7, 57.7, 35.3, 34.2, 33.5, 33.4, 27.5, 12.6, 11.7; ESI-HRMS: calcd. for C<sub>23</sub>H<sub>24</sub>O<sub>5</sub>S+Na<sup>+</sup>: 421.1086, found: 421.1088.



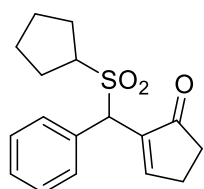

**2-((Cyclopentylsulfonyl)(phenyl)methyl)cyclopent-2-en-1-one (3n)**, yellow solid, 90% yield;  $^1\text{H NMR}$  (400 MHz,  $\text{CDCl}_3$ ):  $\delta$  (ppm) 8.30 (s, 1H), 7.55–7.53 (m, 2H), 7.41–7.37 (m, 3H), 5.30 (s, 1H), 3.21–3.13 (m, 1H), 2.85–2.67 (m, 2H), 2.45 (ddd,  $J = 42.4, 17.6, 6.4$  Hz, 2H), 2.16–1.90 (m, 3H), 1.85–1.71 (m, 3H), 1.62–1.51 (m, 2H);  $^{13}\text{C NMR}$  (100 MHz,  $\text{CDCl}_3$ ):  $\delta$  (ppm) 206.8, 162.6, 138.5, 132.0, 129.8, 129.1, 61.0, 59.6, 33.4, 27.5, 27.4, 26.4, 26.1, 26.0; ESI-HRMS: calcd. for  $\text{C}_{17}\text{H}_{20}\text{O}_3\text{S}+\text{Na}^+$ : 327.1031, found: 327.1033.

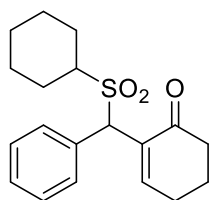

**2-((Cyclohexylsulfonyl)(phenyl)methyl)cyclohex-2-en-1-one (3o)**, white solid, 72% yield;  $^1\text{H NMR}$  (400 MHz,  $\text{CDCl}_3$ ):  $\delta$  (ppm) 7.77 (t,  $J = 4.4$  Hz, 1H), 7.56 (dd,  $J = 8.0, 2.4$  Hz, 2H), 7.40–7.35 (m, 3H), 5.90 (s, 1H), 2.75–2.41 (m, 5H), 2.16–1.94 (m, 4H), 1.87–1.84 (m, 2H), 1.65–1.47 (m, 4H), 1.15–1.08 (m, 2H);  $^{13}\text{C NMR}$  (100 MHz,  $\text{CDCl}_3$ ):  $\delta$  (ppm) 196.3, 151.1, 133.1, 132.7, 129.7, 129.0, 128.7, 59.6, 58.3, 37.8, 26.5, 25.7, 25.1, 25.0, 25.0, 24.2, 22.3; ESI-HRMS: calcd. for  $\text{C}_{19}\text{H}_{24}\text{O}_3\text{S}+\text{Na}^+$ : 355.1344, found: 355.1345.

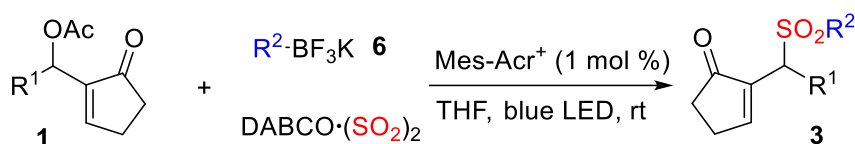

In glovebox, MBH acetate **1** (0.1 mmol), potassium alkyltrifluoroborate **6** (0.15 mmol),  $\text{DABCO}\cdot(\text{SO}_2)_2$  (0.1 mmol), 4-CzIPN (0.001 mmol) were added into a tube equipped with a magnetic stir bar. Then, THF (1.0 mL) was added and the mixture was stirred at room temperature for 48 h under blue LED irradiation. After completion, the resulting crude residue was concentrated in vacuum and purified by column chromatography on silica gel eluting with (EtOAc/*n*-hexane) to afford product **3**.

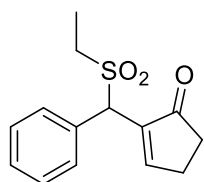

**2-((Ethylsulfonyl)(phenyl)methyl)cyclopent-2-en-1-one (3p)**, colourless oil, 46% yield;  $^1\text{H NMR}$  (400 MHz,  $\text{CDCl}_3$ ):  $\delta$  (ppm) 8.30 (t,  $J = 2.4$  Hz, 1H), 7.56–7.53 (m, 2H), 7.41–7.37 (m, 3H), 5.30 (s, 1H), 2.90–2.68 (m, 4H), 2.55–2.37 (m, 2H), 1.33 (t,  $J = 7.6$  Hz, 3H);  $^{13}\text{C NMR}$  (100 MHz,  $\text{CDCl}_3$ ):  $\delta$  (ppm) 206.8, 162.8, 138.3, 131.6, 129.7, 129.2, 61.6, 46.1, 33.4, 27.4, 6.5; ESI-HRMS: calcd. for  $\text{C}_{14}\text{H}_{16}\text{O}_3\text{S}+\text{Na}^+$ : 287.0718, found: 287.0721.

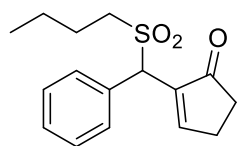

**2-((Butylsulfonyl)(phenyl)methyl)cyclopent-2-en-1-one (3q)**, yellow oil, 98% yield;  $^1\text{H}$  NMR (400 MHz,  $\text{CDCl}_3$ ):  $\delta$  (ppm) 8.29 (t,  $J = 2.6$  Hz, 1H), 7.55–7.52 (m, 2H), 7.41–7.38 (m, 3H), 5.28 (s, 1H), 2.88–2.68 (m, 4H), 2.55–2.37 (m, 2H), 1.83–1.71 (m, 2H), 1.37 (dd,  $J = 14.8, 7.2$  Hz, 2H), 0.89 (t,  $J = 7.2$  Hz, 3H);  $^{13}\text{C}$  NMR (100 MHz,  $\text{CDCl}_3$ ):  $\delta$  (ppm) 206.8, 162.7, 138.3, 131.7, 129.7, 129.2, 129.1, 62.2, 51.4, 33.4, 27.4, 23.8, 21.7, 13.5; ESI-HRMS: calcd. for  $\text{C}_{16}\text{H}_{20}\text{O}_3\text{S}+\text{Na}^+$ : 315.1031, found: 315.1032.

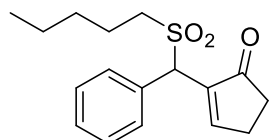

**2-((Pentylsulfonyl)(phenyl)methyl)cyclopent-2-en-1-one (3r)**, yellow oil, 95% yield;  $^1\text{H}$  NMR (400 MHz,  $\text{CDCl}_3$ ):  $\delta$  (ppm) 8.29 (s, 1H), 7.53 (d,  $J = 4.0$  Hz, 2H), 7.39 (d,  $J = 3.6$  Hz, 3H), 5.28 (s, 1H), 2.83–2.73 (m, 4H), 2.46 (ddd,  $J = 42.8, 18.8, 5.6$  Hz, 2H), 1.79 (s, 2H), 1.30–1.26 (m, 4H), 0.88–0.87 (m, 3H);  $^{13}\text{C}$  NMR (100MHz,  $\text{CDCl}_3$ ):  $\delta$  (ppm) 206.8, 162.7, 138.4, 131.7, 129.7, 129.2, 129.1, 62.3, 51.7, 33.4, 30.5, 27.4, 22.1, 21.5, 13.7; ESI-HRMS: calcd. for  $\text{C}_{17}\text{H}_{22}\text{O}_3\text{S}+\text{Na}^+$ : 329.1187, found: 329.1193.

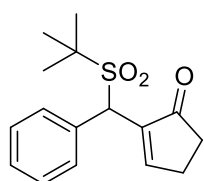

**2-((Tert-butylsulfonyl)(phenyl)methyl)cyclopent-2-en-1-one (3s)**, white solid, 86% yield;  $^1\text{H}$  NMR (400 MHz,  $\text{CDCl}_3$ ):  $\delta$  (ppm) 8.26 (t,  $J = 2.8$  Hz, 1H), 7.60–7.57 (m, 2H), 7.39–7.34 (m, 3H), 5.50 (s, 1H), 2.81–2.63 (m, 2H), 2.43 (ddd,  $J = 42.0, 19.2, 2.4$  Hz, 2H), 1.29 (s, 9H);  $^{13}\text{C}$  NMR (100 MHz,  $\text{CDCl}_3$ ):  $\delta$  (ppm) 206.6, 162.5, 139.8, 133.2, 129.8, 128.9, 129.0, 128.9, 62.7, 58.0, 33.4, 27.3, 24.4; ESI-HRMS: calcd. for  $\text{C}_{16}\text{H}_{20}\text{O}_3\text{S}+\text{Na}^+$ : 315.1031, found: 315.1037.

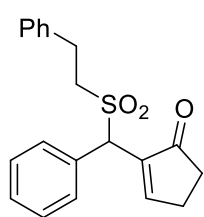

**2-((Phenethylsulfonyl)(phenyl)methyl)cyclopent-2-en-1-one (3t)**, white solid, 55% yield;  $^1\text{H}$  NMR (400 MHz,  $\text{CDCl}_3$ ):  $\delta$  (ppm) 8.29 (t,  $J = 2.0$  Hz, 1H), 7.53–7.51 (m, 2H), 7.40–7.38 (m, 3H), 7.31–7.23 (m, 3H), 7.15–7.11 (m, 2H), 5.30 (s, 1H), 3.14–3.03 (m, 4H), 2.86–2.69 (m, 2H), 2.55–2.38 (m, 2H);  $^{13}\text{C}$  NMR (100 MHz,  $\text{CDCl}_3$ ):  $\delta$  (ppm) 206.7, 162.9, 138.2, 137.5, 131.5, 129.7, 129.3, 129.2, 128.9, 128.5, 127.1, 62.7, 53.2, 33.4, 28.1, 27.5; ESI-HRMS: calcd. for  $\text{C}_{20}\text{H}_{20}\text{O}_3\text{S}+\text{Na}^+$ : 315.1031, found: 315.1029.

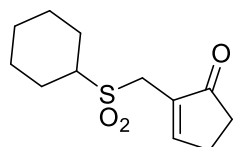

**2-((Cyclohexylsulfonyl)methyl)cyclopent-2-en-1-one (3u)**, white solid, 98% yield;  $^1\text{H}$  NMR (400 MHz,  $\text{CDCl}_3$ ):  $\delta$  (ppm) 7.98 (s, 1H), 3.87 (d,  $J = 0.8$  Hz, 2H),

2.80–2.73 (m, 3H), 2.50–2.48 (m, 2H), 2.21 (d,  $J = 11.2$  Hz, 2H), 1.94–1.91 (m, 2H), 1.73–1.67 (m, 2H), 1.59–1.49 (m, 2H), 1.26–1.23 (m, 3H);  $^{13}\text{C}$  NMR (100 MHz,  $\text{CDCl}_3$ ):  $\delta$  (ppm) 207.3, 165.8, 133.8, 61.1, 44.9, 33.8, 27.5, 25.1, 25.0, 25.0; ESI-HRMS: calcd. for  $\text{C}_{12}\text{H}_{18}\text{O}_3\text{S}+\text{Na}^+$ : 265.0874, found: 265.0880.

## 6. Synergistic photoredox and tertiary amine catalyzed reaction with linear MBH acetates

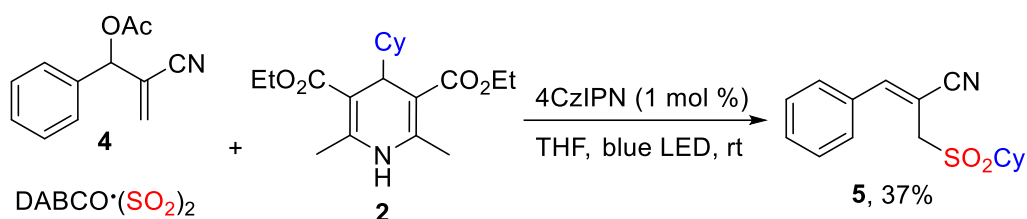

In glovebox, MBH acetate **4** (0.1 mmol), 4-cyclohexyl Hantzsch ester **2** (0.15 mmol),  $\text{DABCO}\cdot(\text{SO}_2)_2$  (0.1 mmol), 4-CzIPN (0.001 mmol) were added into a tube equipped with a magnetic stir bar. Then, THF (1.0 mL) was added and the mixture was stirred at room temperature for 48 h under blue LED irradiation. After completion, the resulting crude residue was concentrated in vacuum and purified by column chromatography on silica gel eluting with (EtOAc/*n*-hexane) to afford (Z)-2-((cyclohexylsulfonyl)methyl)-3-phenylacrylonitrile **5**, white solid, 37% yield;  $^1\text{H}$  NMR (400 MHz,  $\text{CDCl}_3$ ):  $\delta$  (ppm) 7.85–7.82 (m, 2H), 7.48–7.44 (m, 3H), 7.35 (s, 1H), 3.92 (s, 2H), 3.08–3.00 (m, 1H), 2.24 (d,  $J = 11.6$  Hz, 2H), 2.00–1.96 (m, 2H), 1.77–1.59 (m, 3H), 1.39–1.24 (m, 3H);  $^{13}\text{C}$  NMR (100 MHz,  $\text{CDCl}_3$ ):  $\delta$  (ppm) 152.4, 132.5, 131.7, 129.5, 129.1, 117.8, 97.1, 76.7, 60.9, 54.9, 25.1, 25.0; ESI-HRMS: calcd. for  $\text{C}_{16}\text{H}_{19}\text{NO}_2\text{S}+\text{Na}^+$ : 312.1034, found: 312.1034.

## 7. Condition optimization of synergistic photoredox and tertiary amine catalyzed reaction with inorganic sulfites as the source of sulfonyl group<sup>a</sup>

reaction with inorganic sulfites as the source of sulfonyl group<sup>a</sup>

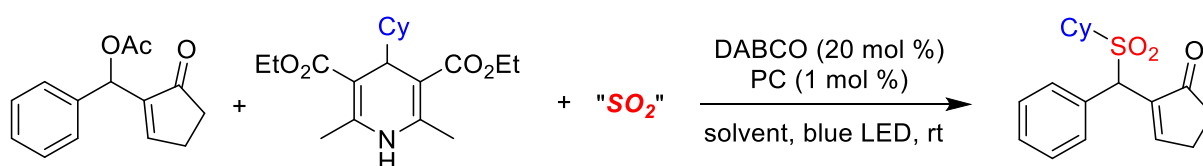

| entry     | Inorganic sulfites                            | Photocatalyst                        | Solvent     | Yield <sup>b</sup> (%) |
|-----------|-----------------------------------------------|--------------------------------------|-------------|------------------------|
| 1         | NaHSO <sub>3</sub>                            | 4-CzIPN                              | THF         | /                      |
| 2         | NaHSO <sub>3</sub>                            | 4-CzIPN                              | DMF         | /                      |
| 3         | NaHSO <sub>3</sub>                            | 4-CzIPN                              | EA          | /                      |
| 4         | NaHSO <sub>3</sub>                            | 4-CzIPN                              | Xylene      | /                      |
| 5         | NaHSO <sub>3</sub>                            | 4-CzIPN                              | MeCN        | /                      |
| 6         | NaHSO <sub>3</sub>                            | 4-CzIPN                              | 1,4-dioxane | /                      |
| 7         | NaHSO <sub>3</sub>                            | 4-CzIPN                              | DCE         | 24                     |
| 8         | Na <sub>2</sub> S <sub>2</sub> O <sub>5</sub> | 4-CzIPN                              | DCE         | /                      |
| 9         | Na <sub>2</sub> SO <sub>3</sub>               | 4-CzIPN                              | DCE         | /                      |
| 10        | K <sub>2</sub> SO <sub>3</sub>                | 4-CzIPN                              | DCE         | 3                      |
| 11        | NaHSO <sub>3</sub>                            | Ru(bpy) <sub>3</sub> Cl <sub>2</sub> | DCE         | 23                     |
| 12        | NaHSO <sub>3</sub>                            | Fluorescein                          | DCE         | 30                     |
| <b>13</b> | <b>NaHSO<sub>3</sub></b>                      | <b>Mes-Acr<sup>+</sup></b>           | <b>DCE</b>  | <b>53</b>              |
| 14        | NaHSO <sub>3</sub>                            | Ir(ppy) <sub>3</sub>                 | DCE         | 20                     |

<sup>a</sup>Reaction conditions: MBH acetate (0.1 mmol), 4-substituted Hantzsch ester (0.1 mmol), inorganic sulfites (0.1 mmol), photocatalyst (0.001 mmol), DABCO (0.002 mol), solvent (1.0 mL), blue LED, rt, 48 h, under a N<sub>2</sub> atmosphere. <sup>b</sup>Isolated yield based on MBH acetate.

## 8. Condition optimization for asymmetric synergistic photoredox and tertiary amine catalyzed reaction of MBH acetate<sup>a</sup>

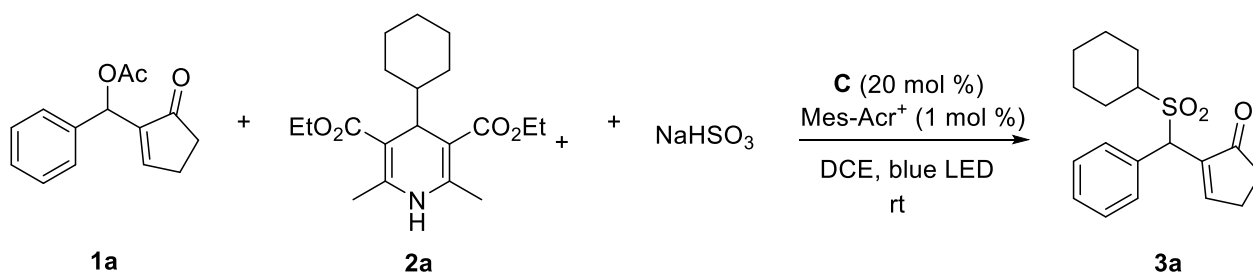

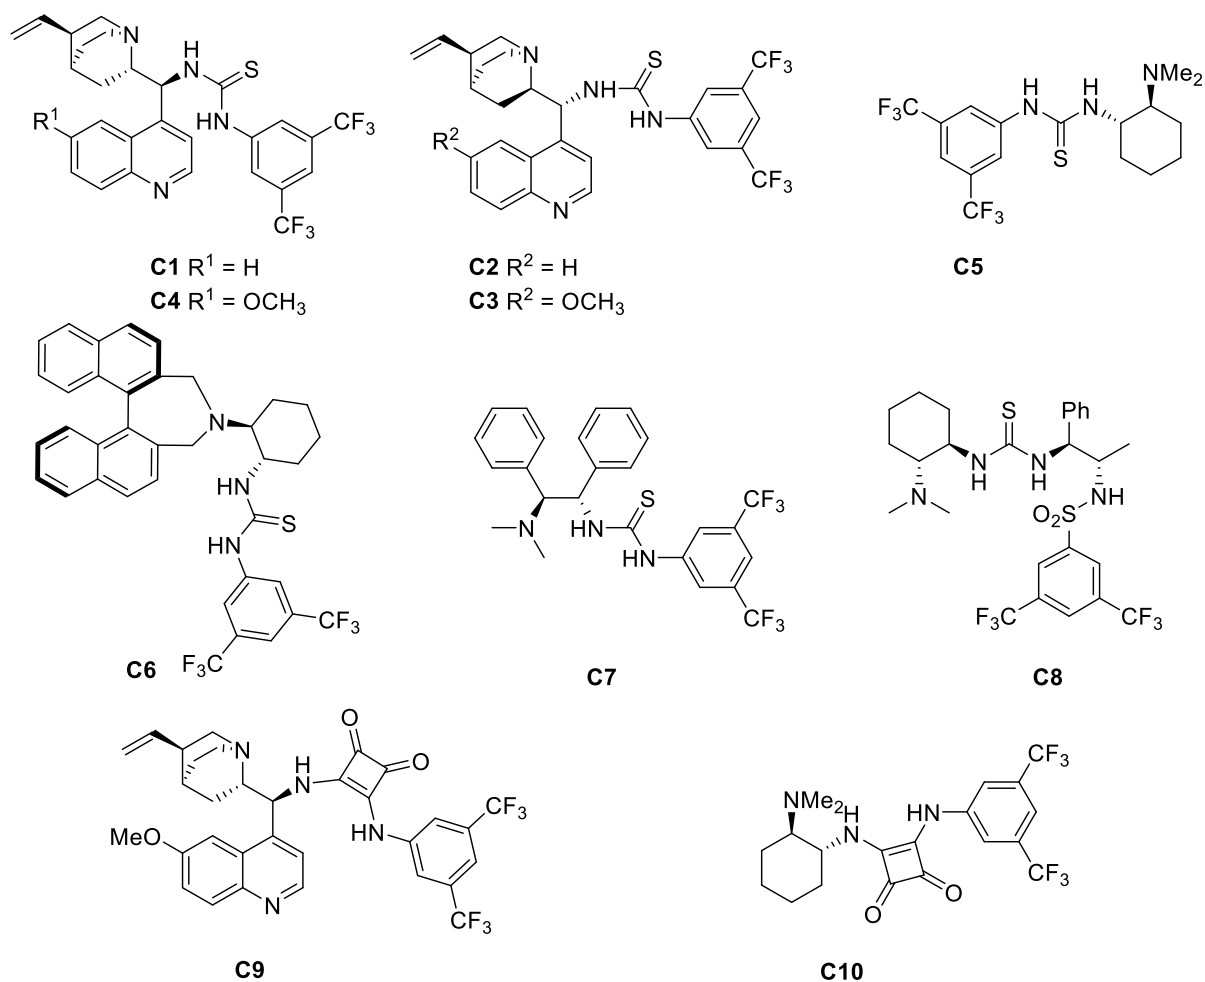

| entry | Catalyst   | Yield <sup>b</sup> (%) | Ee <sup>c</sup> (%) |
|-------|------------|------------------------|---------------------|
| 1     | <b>C1</b>  | 41                     | 16                  |
| 2     | <b>C2</b>  | 35                     | /                   |
| 3     | <b>C3</b>  | 45                     | 16                  |
| 4     | <b>C4</b>  | 55                     | 33                  |
| 5     | <b>C5</b>  | 52                     | 18                  |
| 6     | <b>C6</b>  | 6                      | /                   |
| 7     | <b>C7</b>  | 50                     | 16                  |
| 8     | <b>C8</b>  | 48                     | 8                   |
| 9     | <b>C9</b>  | 43                     | /                   |
| 10    | <b>C10</b> | 45                     | /                   |

<sup>a</sup>Unless noted otherwise, reactions were performed with MBH acetate **1a** (0.1 mmol), 4-substituted Hantzsch ester **2a** (0.15 mmol), NaHSO<sub>3</sub> (0.1 mmol), Mes-Acr<sup>+</sup> (0.001 mmol), catalyst (0.02 mmol), DCE (1 mL), blue LED, rt, 48 h, under N<sub>2</sub> atmosphere. <sup>b</sup>Determined by <sup>1</sup>H-NMR spectroscopy. <sup>c</sup>Determined by HPLC analysis on chiral stationary phase.

## 9. HRMS spectrum of captured intermediate A

wxh-4-32-1

wj20201124-1-3 15 (0.310) AM2 (Ar,20000.0,0.00,0.00); Cm (15-5)

1: TOF MS ES+  
2.51e3

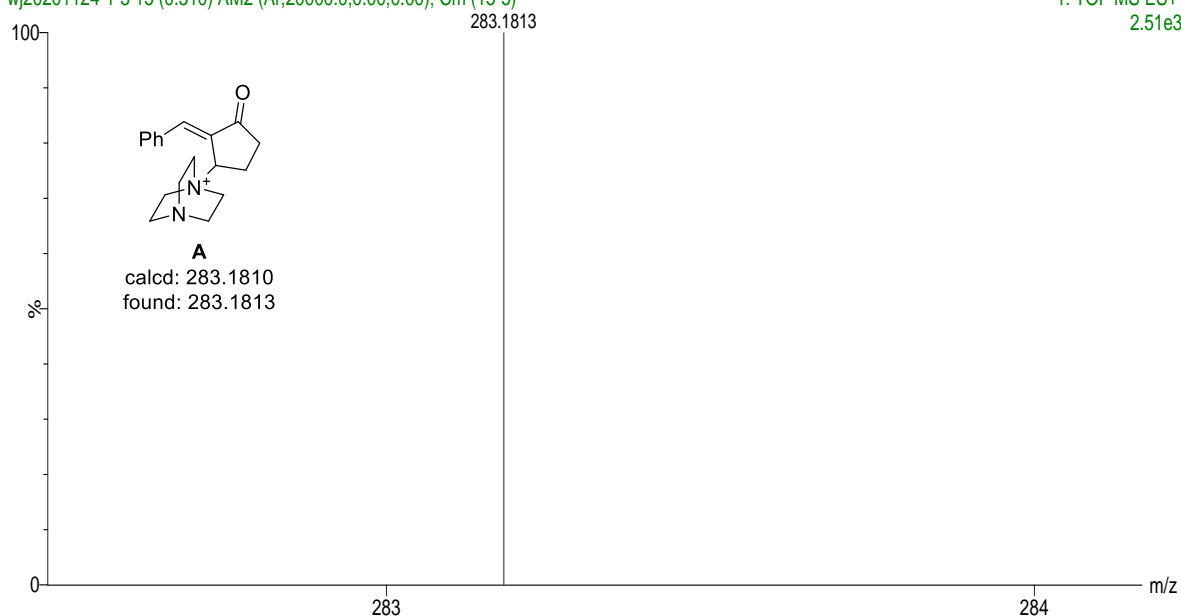

## 10. Crystal data and structural refinement for 3j

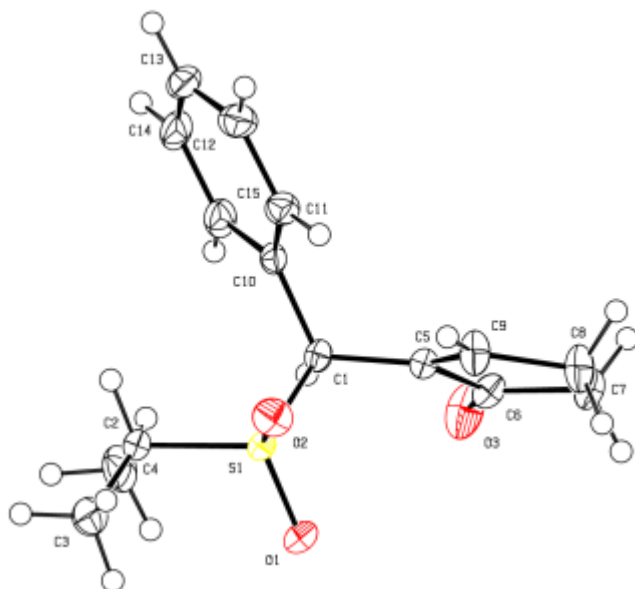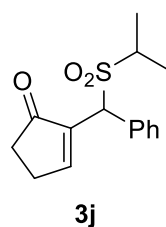

|                     |                                                  |
|---------------------|--------------------------------------------------|
| Identification code | <b>3j</b>                                        |
| Empirical formula   | C <sub>15</sub> H <sub>18</sub> O <sub>3</sub> S |
| Formula weight      | 278.35                                           |
| Temperature         | 173(2) K                                         |

|                                   |                                             |                |
|-----------------------------------|---------------------------------------------|----------------|
| Wavelength                        | 1.34138 Å                                   |                |
| Crystal system                    | Monoclinic                                  |                |
| Space group                       | Cc                                          |                |
| Unit cell dimensions              | a = 13.5251(14) Å                           | = 90°.         |
|                                   | b = 10.9872(11) Å                           | = 100.546(4)°. |
|                                   | c = 9.4818(9) Å                             | = 90°.         |
| Volume                            | 1385.2(2) Å <sup>3</sup>                    |                |
| Z                                 | 4                                           |                |
| Density (calculated)              | 1.335 Mg/m <sup>3</sup>                     |                |
| Absorption coefficient            | 1.369 mm <sup>-1</sup>                      |                |
| F(000)                            | 592                                         |                |
| Crystal size                      | 0.270 x 0.210 x 0.080 mm <sup>3</sup>       |                |
| Theta range for data collection   | 4.542 to 58.479°.                           |                |
| Index ranges                      | -17<=h<=16, -13<=k<=13, -12<=l<=12          |                |
| Reflections collected             | 10335                                       |                |
| Independent reflections           | 2899 [R(int) = 0.0322]                      |                |
| Completeness to theta = 53.594°   | 99.8 %                                      |                |
| Absorption correction             | Semi-empirical from equivalents             |                |
| Max. and min. transmission        | 0.752 and 0.634                             |                |
| Refinement method                 | Full-matrix least-squares on F <sup>2</sup> |                |
| Data / restraints / parameters    | 2899 / 2 / 174                              |                |
| Goodness-of-fit on F <sup>2</sup> | 1.079                                       |                |
| Final R indices [I>2sigma(I)]     | R1 = 0.0233, wR2 = 0.0587                   |                |
| R indices (all data)              | R1 = 0.0240, wR2 = 0.0591                   |                |
| Absolute structure parameter      | 0.032(7)                                    |                |
| Extinction coefficient            | n/a                                         |                |
| Largest diff. peak and hole       | 0.215 and -0.171 e.Å <sup>-3</sup>          |                |

## 11. NMR spectra and HPLC chromatograph

8.30  
7.55  
7.54  
7.53  
7.41  
7.38  
7.37

5.38  
2.79  
2.78  
2.77  
2.73  
2.72  
2.71  
2.70  
2.69  
2.68  
2.67  
2.66  
2.48  
2.46  
2.41  
2.41  
2.40  
2.17  
2.14  
2.06  
2.03  
1.87  
1.64  
1.60  
1.57  
1.55  
1.52  
1.18  
1.15  
1.12

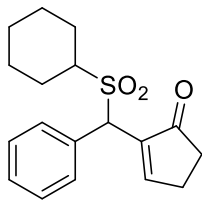

**3a**

$^1\text{H}$  NMR (400 MHz,  $\text{CDCl}_3$ )

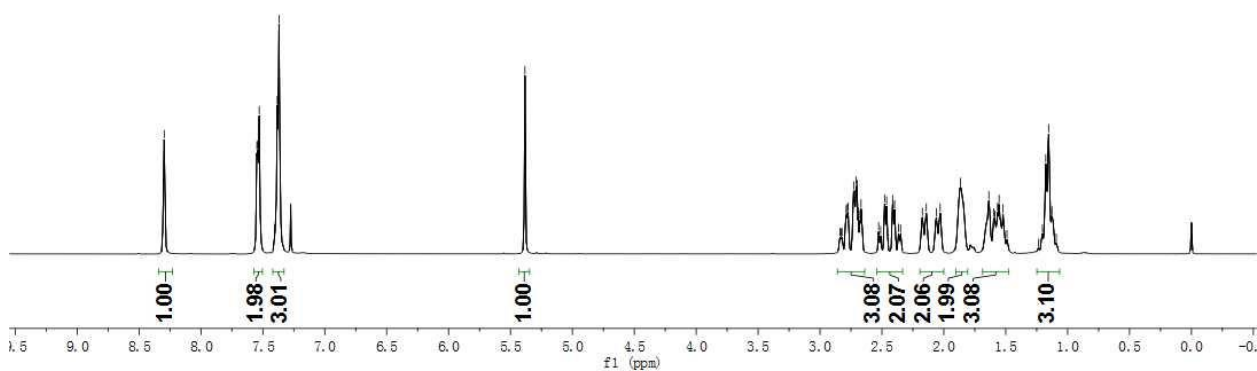

206.71  
162.72  
138.51  
131.83  
129.73  
129.02  
59.36  
58.98  
33.43  
27.39  
25.55  
25.03  
24.98  
24.91  
24.33

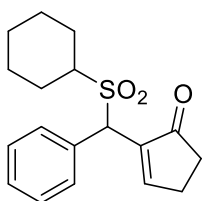

**3a**

$^{13}\text{C}$  NMR (100 MHz,  $\text{CDCl}_3$ )

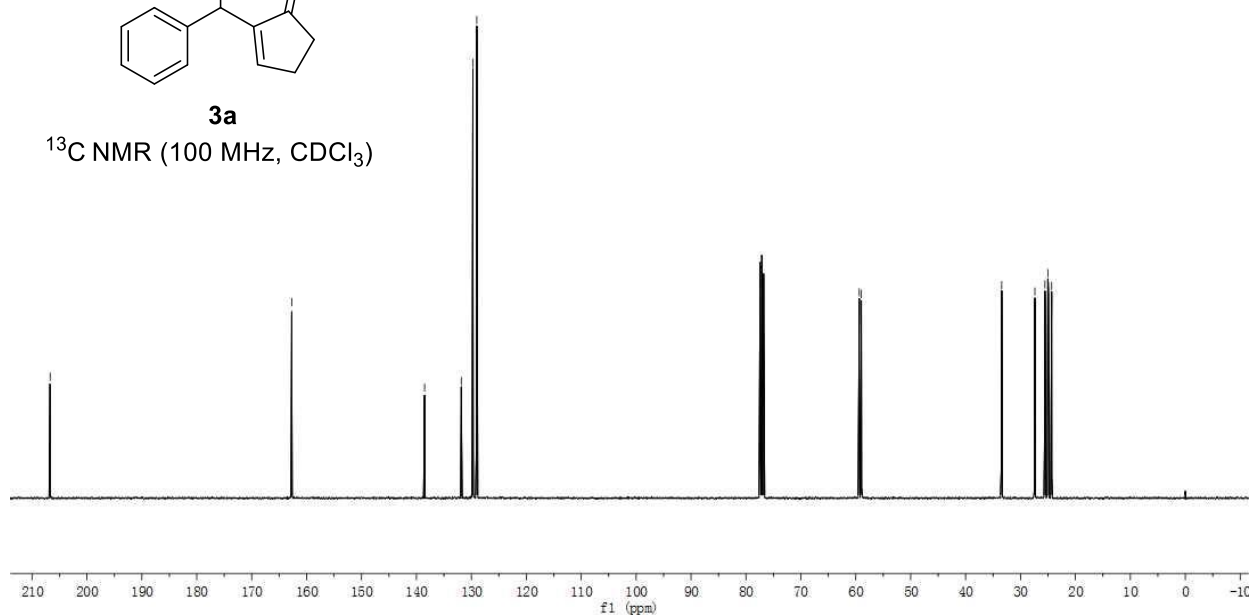



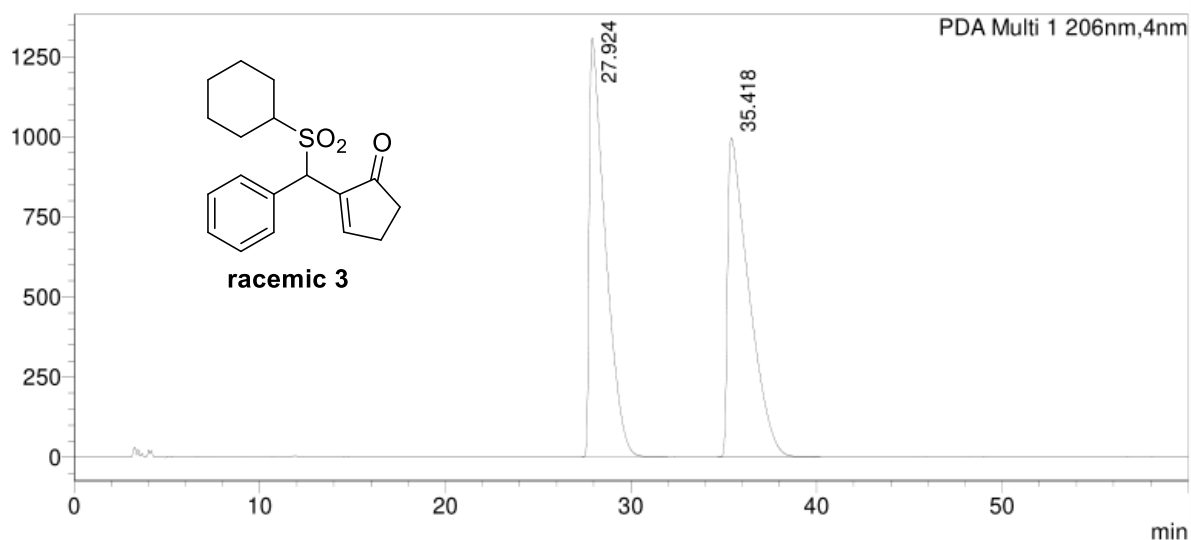

<Peak Table>

PDA Ch1 206nm

| Peak# | Ret. Time | Area     | Height  | Aera%  |
|-------|-----------|----------|---------|--------|
| 1     | 27.924    | 78859860 | 1307806 | 49.811 |
| 2     | 35.418    | 79458776 | 995986  | 50.189 |

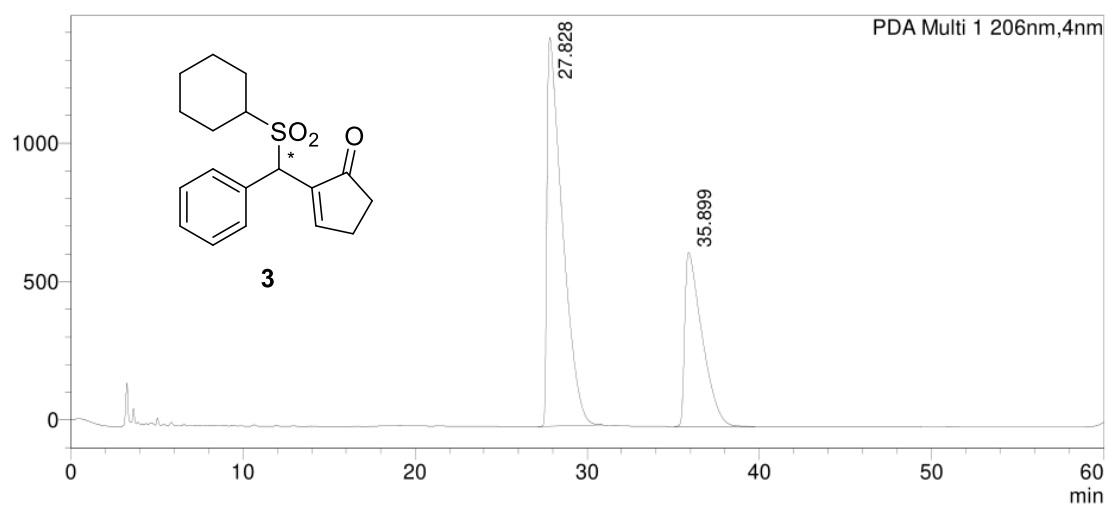

<Peak Table>

PDA Ch1 206nm

| Peak# | Ret. Time | Area     | Height  | Aera%  |
|-------|-----------|----------|---------|--------|
| 1     | 27.828    | 87544864 | 1404533 | 66.590 |
| 2     | 35.899    | 43924032 | 628778  | 33.410 |

8.26  
8.25  
8.25  
7.72  
7.71  
7.71  
7.71  
7.70  
7.25  
7.24  
7.24  
7.23  
7.22  
7.21  
7.20  
5.73  
2.79  
2.78  
2.78  
2.77  
2.76  
2.75  
2.74  
2.73  
2.72  
2.72  
2.71  
2.49  
2.48  
2.47  
2.43  
2.42  
2.41  
2.40  
2.11  
2.07  
1.90  
1.89  
1.89  
1.88  
1.87  
1.67  
1.66  
1.57  
1.56  
1.55  
1.54  
1.22  
1.21  
1.19

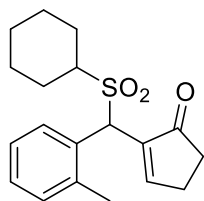

**3b**

$^1\text{H NMR}$  (400 MHz,  $\text{CDCl}_3$ )

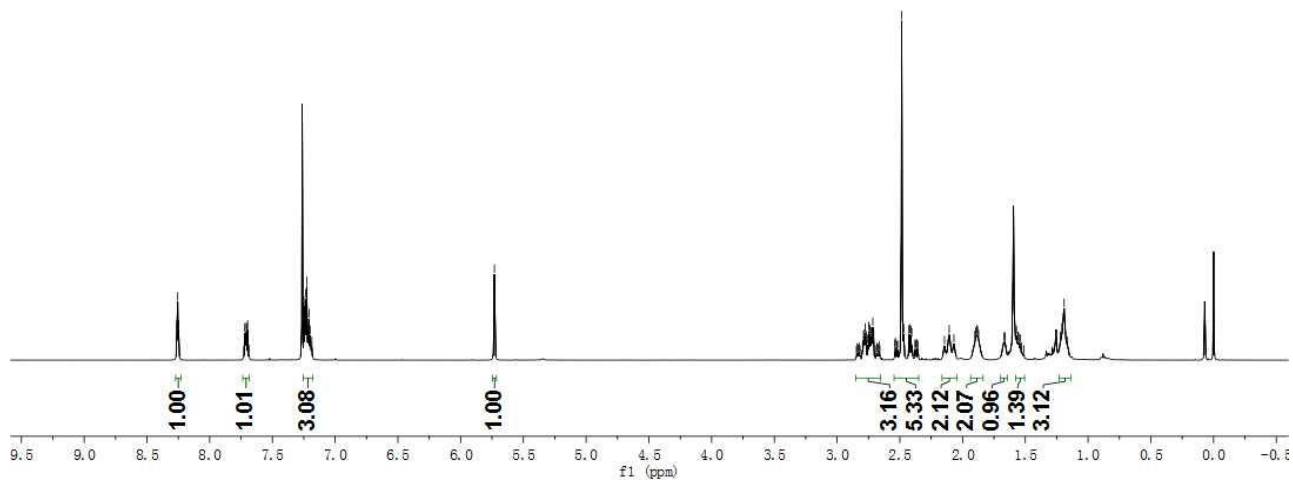

206.89  
163.34  
139.71  
137.93  
130.94  
129.90  
128.96  
128.76  
126.54  
60.18  
54.15  
33.51  
27.50  
25.52  
25.13  
25.01  
24.70  
19.97

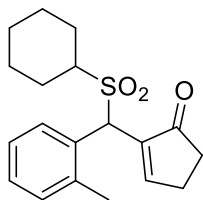

**3b**

$^{13}\text{C NMR}$  (100 MHz,  $\text{CDCl}_3$ )

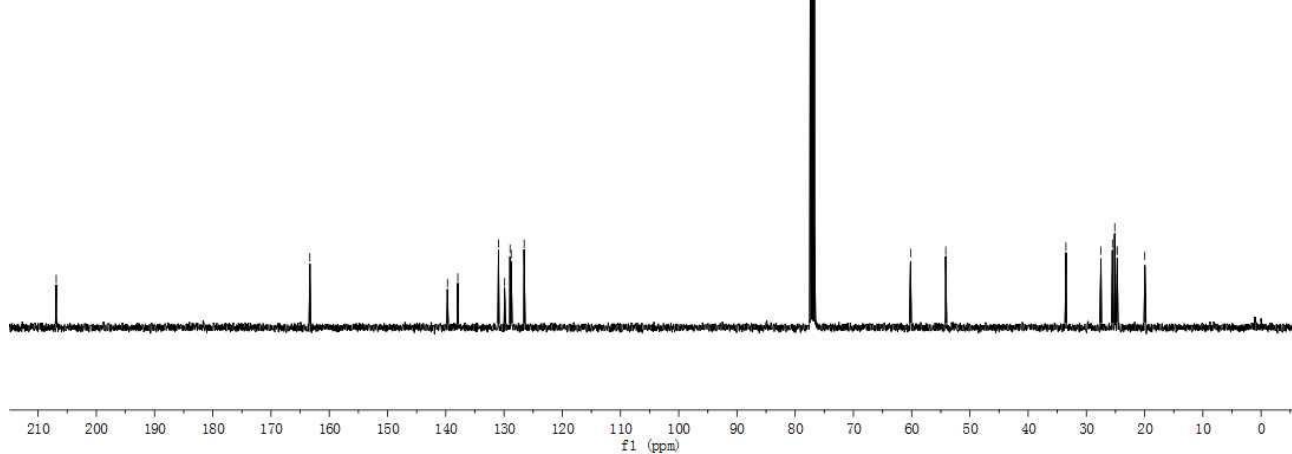

8.30  
8.29  
8.28  
7.35  
7.33  
7.28  
7.27  
7.25  
7.18  
7.16  
5.34  
2.79  
2.78  
2.78  
2.74  
2.73  
2.72  
2.72  
2.71  
2.70  
2.68  
2.67  
2.48  
2.48  
2.47  
2.46  
2.42  
2.41  
2.40  
2.40  
2.39  
2.36  
2.17  
2.14  
2.05  
1.88  
1.87  
1.85  
1.66  
1.66  
1.64  
1.60  
1.57  
1.56  
1.55  
1.54  
1.52  
1.18  
1.16  
1.13

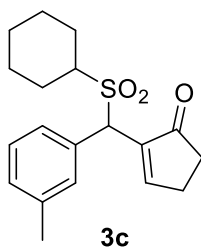

**3c**

$^1\text{H NMR}$  (400 MHz,  $\text{CDCl}_3$ )

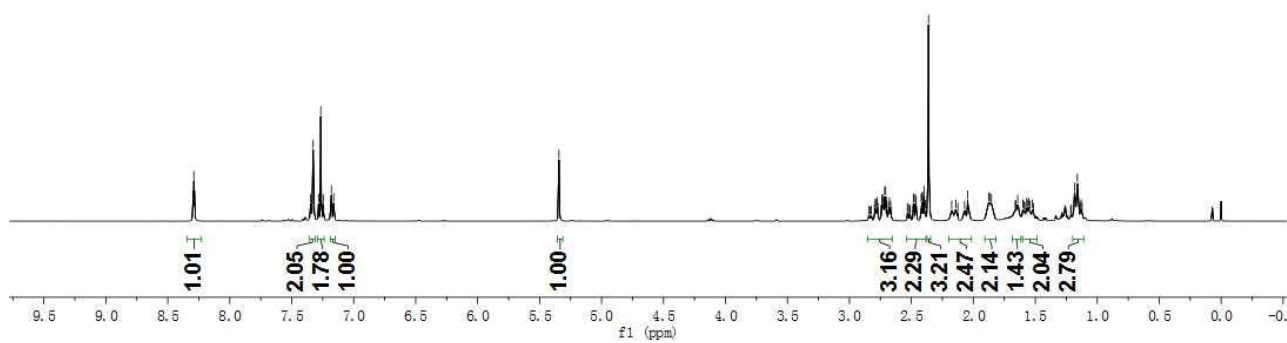

-206.84

-162.79

138.83

138.60

131.72

130.33

129.85

128.90

126.76

59.30

58.90

33.46

27.40

25.57

25.05

25.00

24.92

24.32

21.47

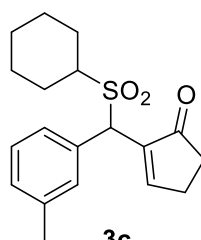

**3c**

$^{13}\text{C NMR}$  (100 MHz,  $\text{CDCl}_3$ )

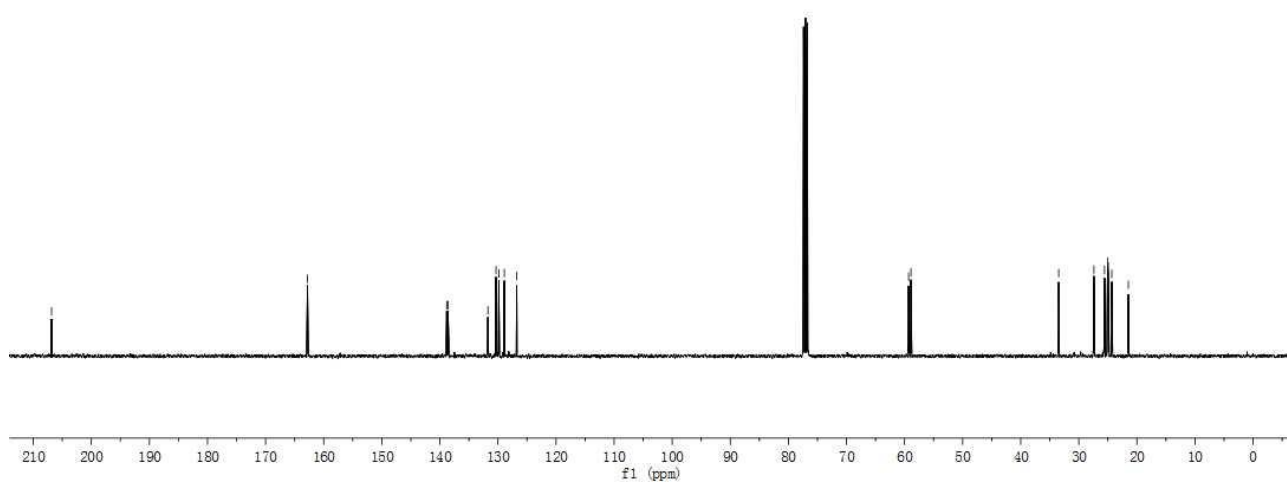

8.28  
7.45  
7.43  
7.27  
6.91  
6.89  
5.33  
3.81  
2.79  
2.78  
2.77  
2.73  
2.72  
2.71  
2.70  
2.69  
2.68  
2.67  
2.53  
2.52  
2.48  
2.48  
2.46  
2.46  
2.42  
2.41  
2.40  
2.40  
2.37  
2.37  
2.35  
2.16  
2.13  
2.05  
2.02  
1.88  
1.64  
1.60  
1.59  
1.58  
1.57  
1.56  
1.55  
1.54  
1.52  
1.21  
1.18  
1.16  
1.13  
1.13

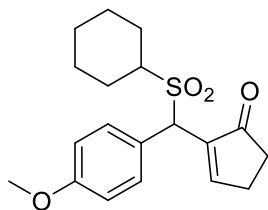

**3d**

$^1\text{H NMR}$  (400 MHz,  $\text{CDCl}_3$ )

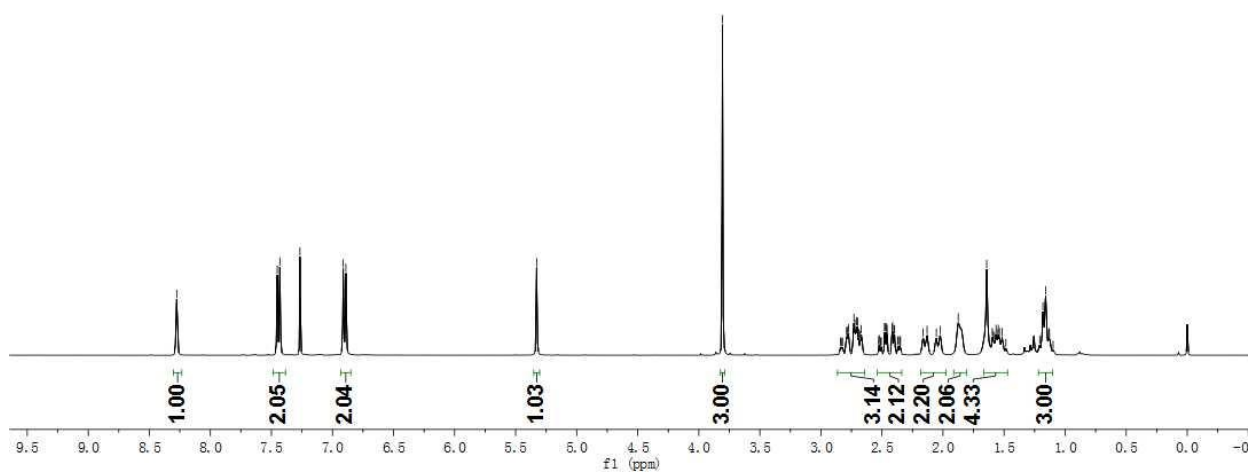

-206.87  
162.39  
160.13  
138.75  
130.96  
123.51  
114.47  
59.07  
58.33  
55.33  
33.45  
27.38  
25.62  
25.06  
25.01  
24.93  
24.23

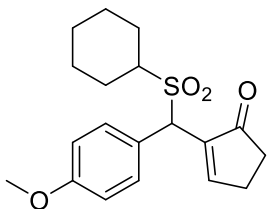

**3d**

$^{13}\text{C NMR}$  (100 MHz,  $\text{CDCl}_3$ )

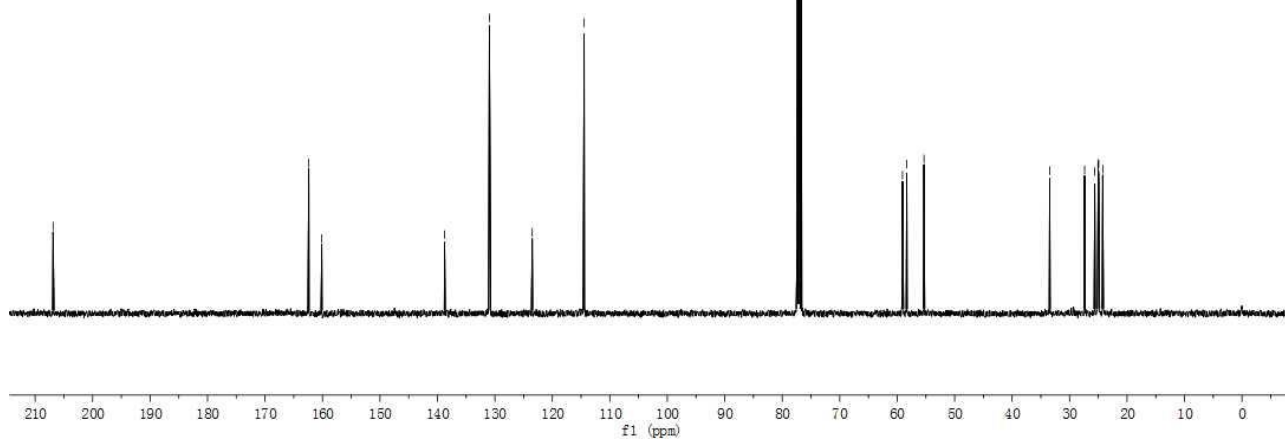

8.15  
8.14  
8.13  
7.87  
7.87  
7.85  
7.85  
7.63  
7.62  
7.61  
7.60  
7.39  
7.38  
7.37  
7.36  
7.35  
7.35  
7.24  
7.23  
7.22  
7.21  
7.20  
6.13  
2.80  
2.79  
2.78  
2.77  
2.73  
2.71  
2.51  
2.50  
2.49  
2.49  
2.45  
2.44  
2.43  
2.43  
1.89  
1.88  
1.88  
1.68  
1.58  
1.58  
1.57  
1.56  
1.55  
1.23  
1.21  
1.20  
1.20

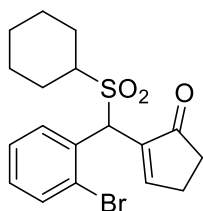

**3e**

$^1\text{H NMR}$  (400 MHz,  $\text{CDCl}_3$ )

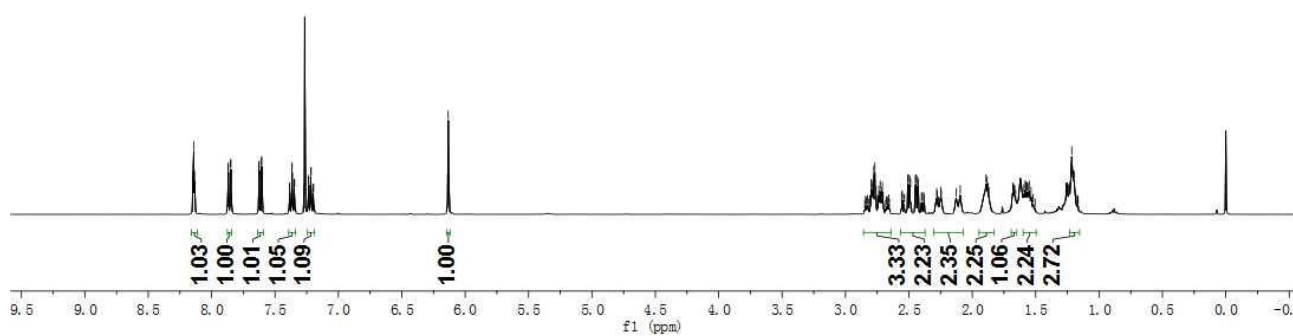

-206.26

-163.59

138.89  
133.47  
131.84  
130.90  
130.30  
127.93  
125.87

60.68  
57.64

33.53  
27.51  
25.30  
25.19  
25.13  
25.02

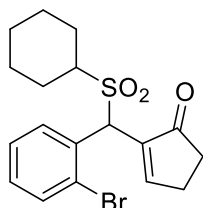

**3e**

$^{13}\text{C NMR}$  (100 MHz,  $\text{CDCl}_3$ )

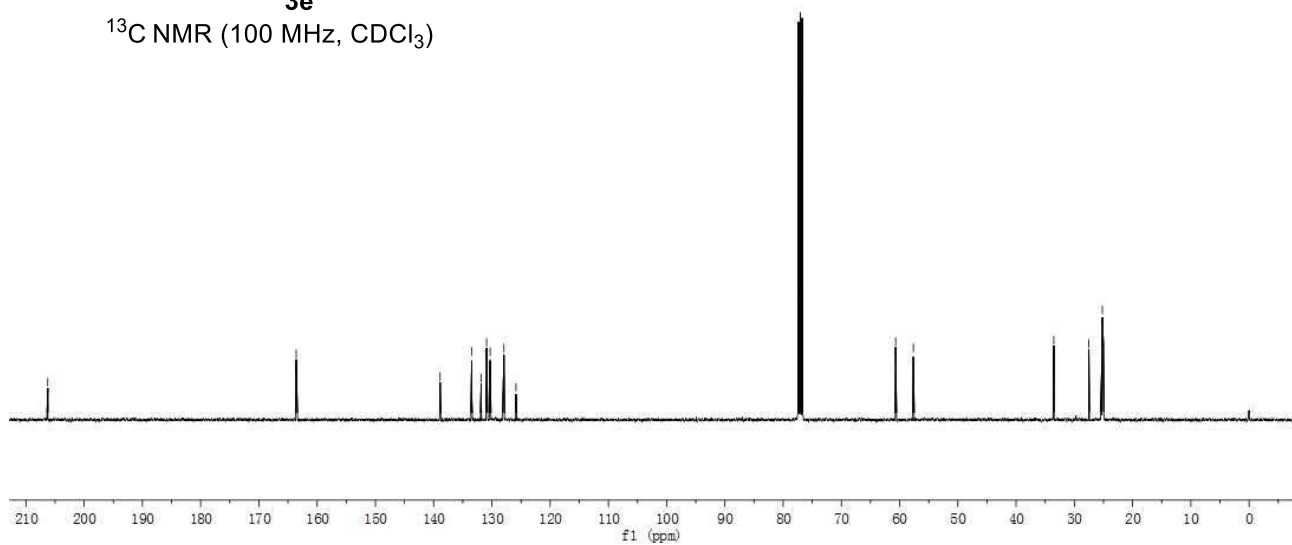

8.29 8.29 8.28 7.53 7.52 7.43 7.43 7.42 7.41 7.41 7.41 7.36 7.35 7.34 7.34 7.33 7.31 5.33 2.81 2.80 2.80 2.77 2.76 2.75 2.73 2.72 2.71 2.69 2.50 2.49 2.48 2.48 2.45 2.44 2.43 2.42 2.13 2.13 2.05 1.89 1.89 1.68 1.66 1.58 1.57 1.56 1.54 1.20 1.18 1.15

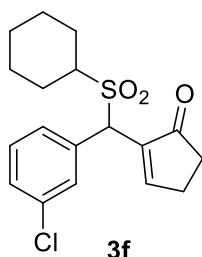

$^1\text{H NMR}$  (400 MHz,  $\text{CDCl}_3$ )

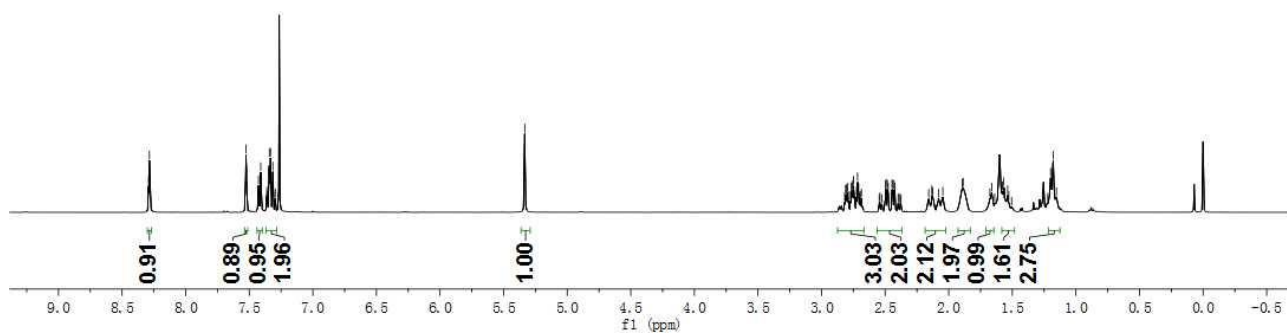

-206.59 -163.05 138.22 134.92 133.64 130.18 129.73 129.32 128.08 59.67 58.36 33.44 27.48 25.36 25.01 24.96 24.93 24.54

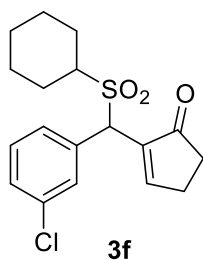

$^{13}\text{C NMR}$  (100 MHz,  $\text{CDCl}_3$ )

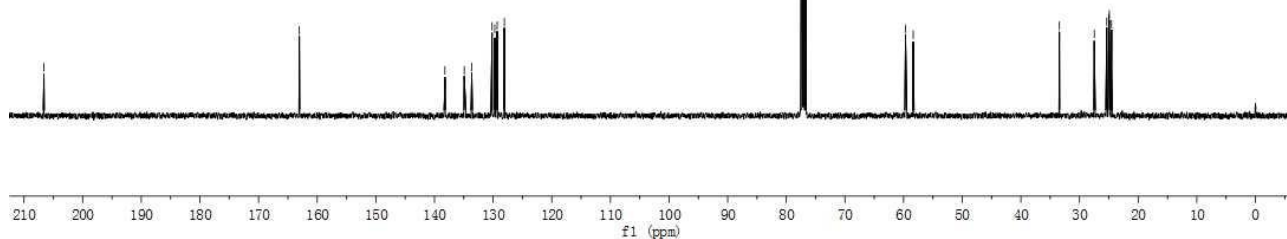

8.31  
8.30  
8.30  
7.68  
7.66  
7.65  
7.63  
5.43  
2.82  
2.82  
2.81  
2.80  
2.76  
2.75  
2.75  
2.72  
2.71  
2.71  
2.70  
2.69  
2.68  
2.55  
2.51  
2.50  
2.49  
2.48  
2.44  
2.44  
2.43  
2.42  
2.17  
2.13  
2.13  
2.09  
2.09  
2.05  
1.90  
1.89  
1.67  
1.64  
1.62  
1.61  
1.60  
1.59  
1.58  
1.57  
1.55  
1.18  
1.16

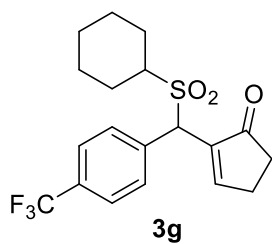

<sup>1</sup>H NMR (400 MHz, CDCl<sub>3</sub>)

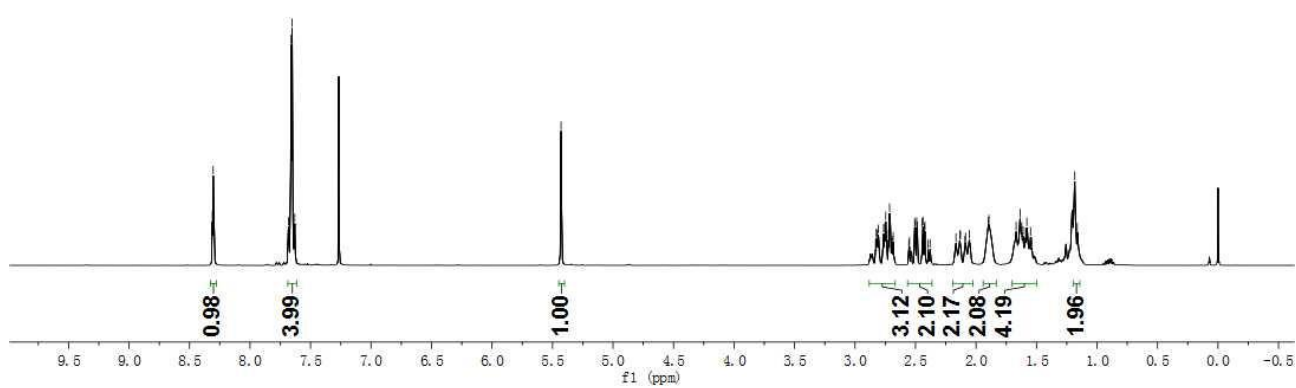

206.56  
163.12  
138.19  
135.65  
131.68  
131.35  
131.03  
130.70  
130.24  
127.84  
126.01  
125.98  
125.94  
125.90  
125.13  
122.43  
119.72  
59.81  
58.44  
33.44  
27.51  
25.24  
24.97  
24.92  
24.91  
24.62

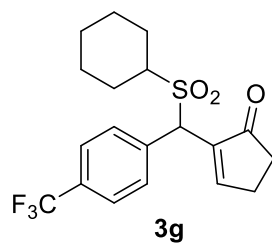

<sup>13</sup>C NMR (100 MHz, CDCl<sub>3</sub>)

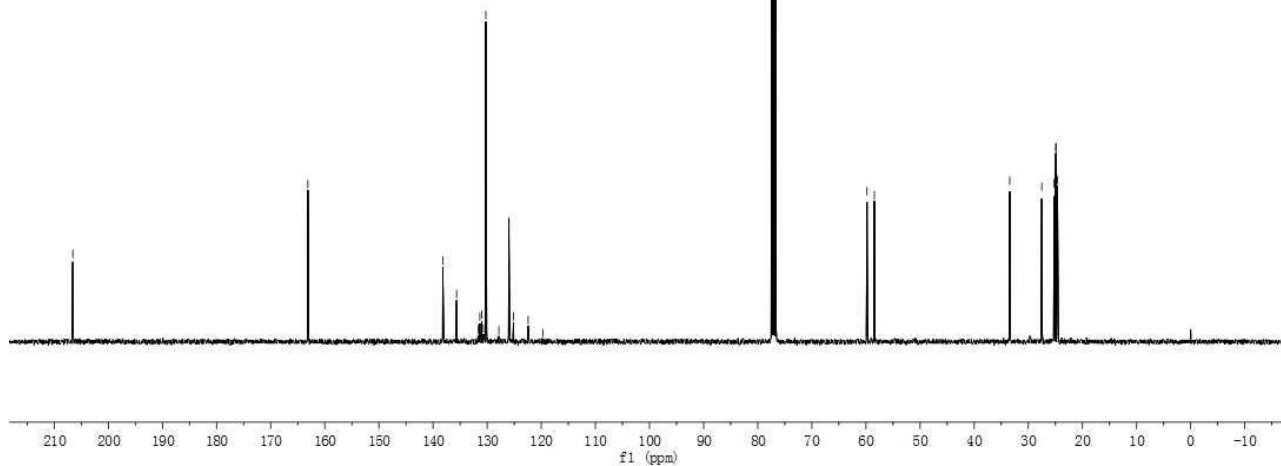

8.39 8.38 8.37 8.00 7.88 7.86 7.84 7.83 7.68 7.66 7.66 7.53 7.52 7.51 7.50 5.56 2.82 2.81 2.80 2.74 2.73 2.73 2.70 2.50 2.50 2.49 2.48 2.42 2.41 2.40 2.40 2.20 2.06 1.88 1.85 1.83 1.64 1.63 1.61 1.58 1.57 1.54 1.17 1.15 1.13 1.12 1.12 1.10 1.09

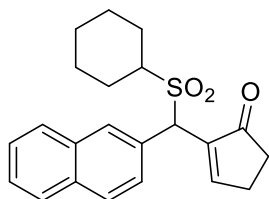

**3h**  
<sup>1</sup>H NMR (400 MHz, CDCl<sub>3</sub>)

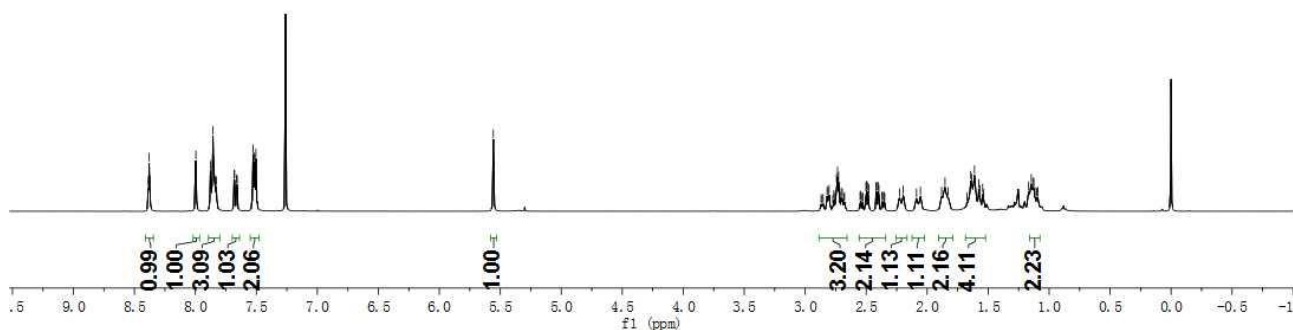

206.78 162.76 138.56 133.28 133.23 129.48 129.38 128.95 128.20 127.69 126.91 126.63 126.47 59.39 59.09 33.46 27.44 25.74 24.98 24.88 24.18

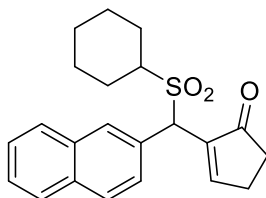

**3h**  
<sup>13</sup>C NMR (100 MHz, CDCl<sub>3</sub>)

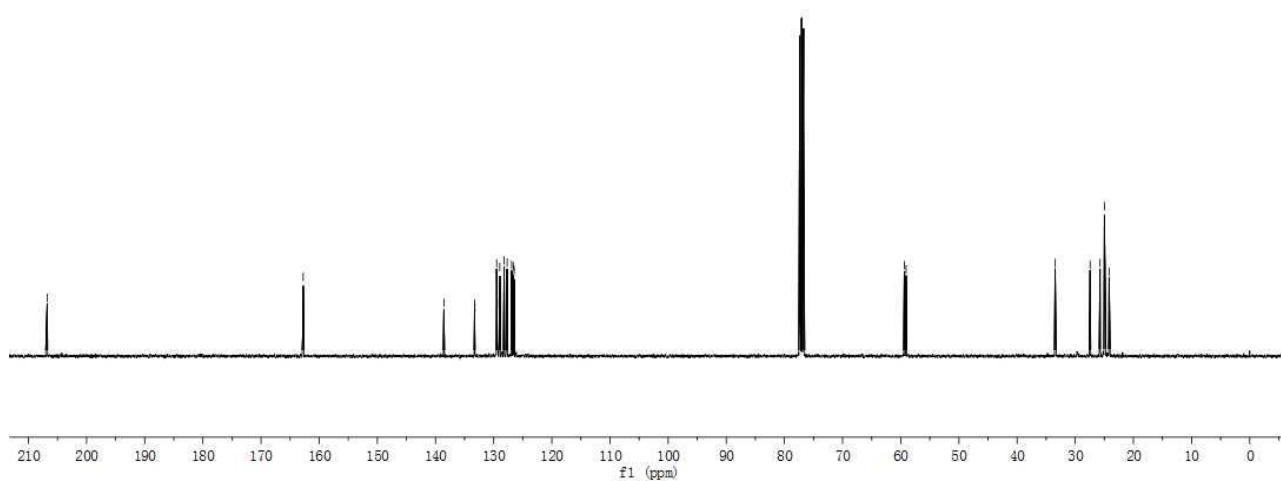



8.27 8.27 8.26 7.36 7.35 7.24 7.23 7.04 7.03 7.02 7.01 5.71 2.85 2.84 2.82 2.81 2.80 2.79 2.78 2.76 2.76 2.75 2.74 2.73 2.52 2.52 2.51 2.50 2.48 2.48 2.47 2.46 2.19 2.16 2.11 2.08 1.89 1.88 1.87 1.68 1.66 1.54 1.54 1.23 1.22 1.21 1.20 1.19 1.17 1.16

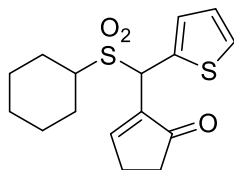

**3i**

$^1\text{H NMR}$  (400 MHz,  $\text{CDCl}_3$ )

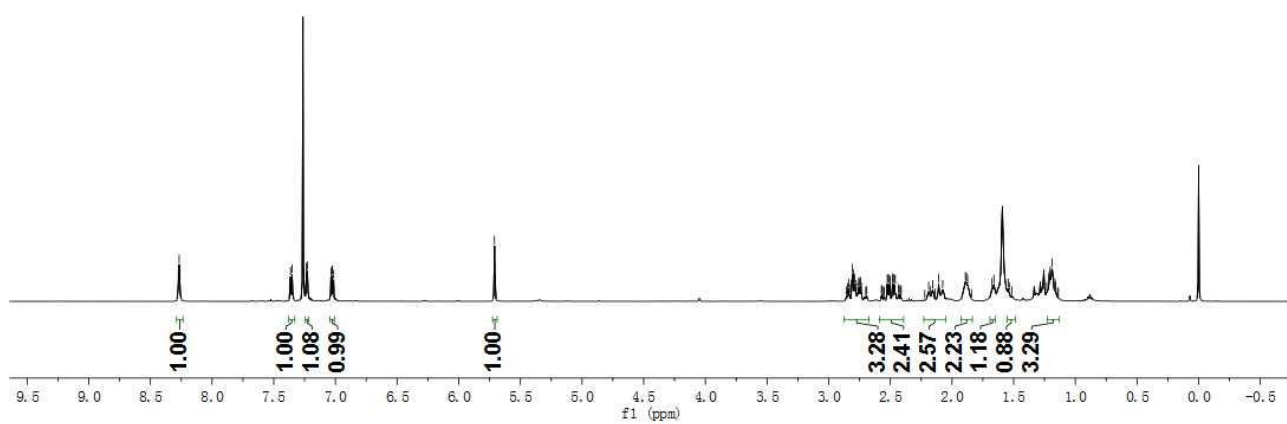

-206.31

-164.12

138.29

133.50

129.33

127.46

127.24

-59.09

-54.32

33.55

27.42

25.83

25.07

24.99

24.91

24.24

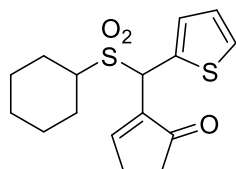

**3i**

$^{13}\text{C NMR}$  (100 MHz,  $\text{CDCl}_3$ )

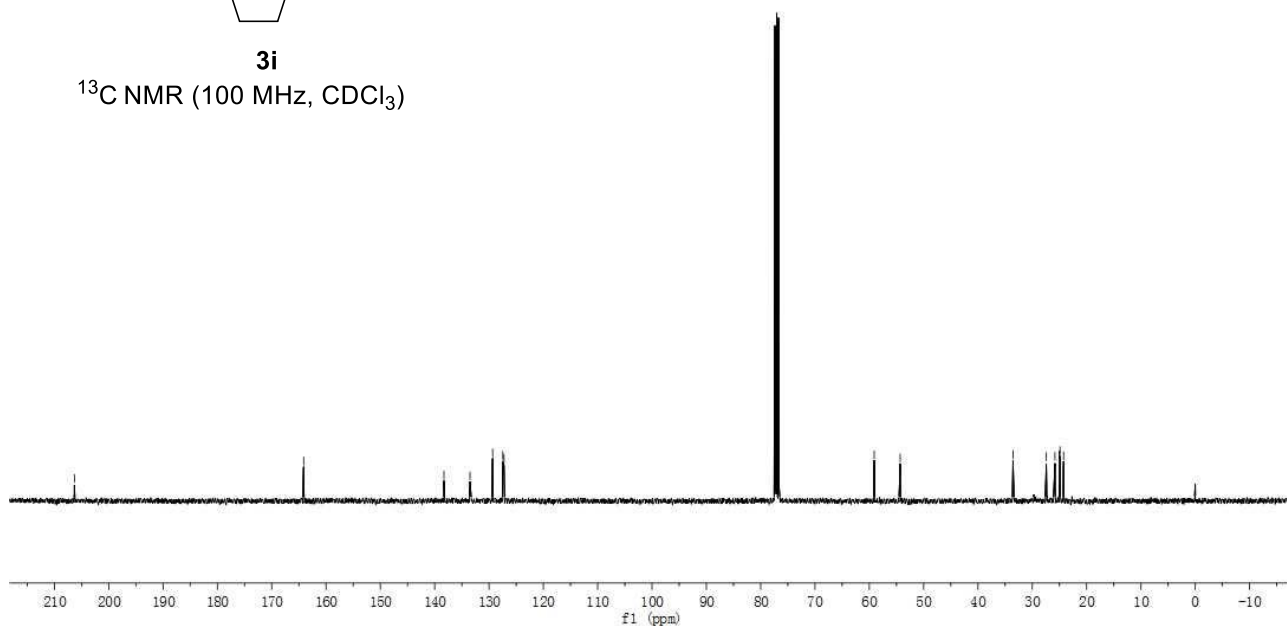

7.90  
7.60  
7.59  
7.53  
7.52  
7.14  
7.13  
7.12

4.91  
4.89  
3.18  
3.15  
3.12  
2.93  
2.90  
2.88  
2.85  
2.68  
2.65  
2.64  
2.62  
2.41  
2.39  
2.37  
2.34  
2.24  
2.23  
1.95  
1.77  
1.74  
1.72  
1.64  
1.63  
1.61  
1.26  
1.24  
1.21

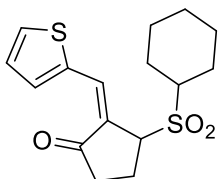

**3i'**

<sup>1</sup>H NMR (400 MHz, CDCl<sub>3</sub>)

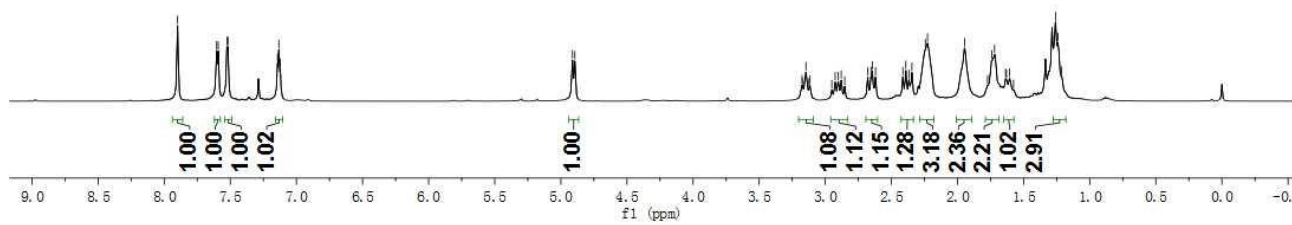

204.06

137.54  
136.01  
132.39  
131.72  
128.06  
124.87

60.76  
59.75

34.89  
26.21  
25.21  
25.13  
25.01  
24.47  
23.09

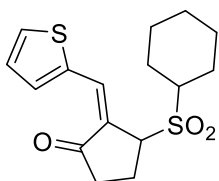

**3i'**

<sup>13</sup>C NMR (100 MHz, CDCl<sub>3</sub>)

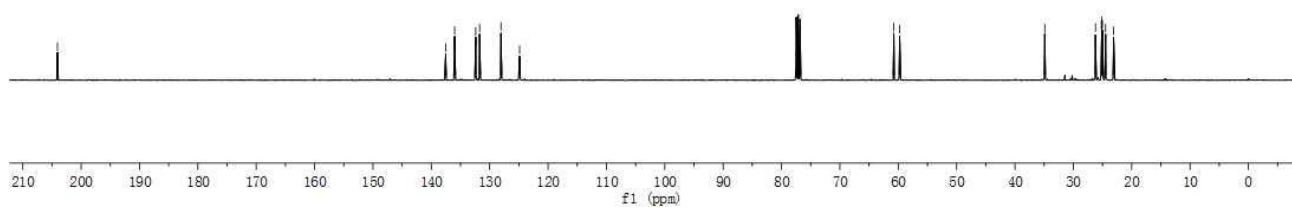

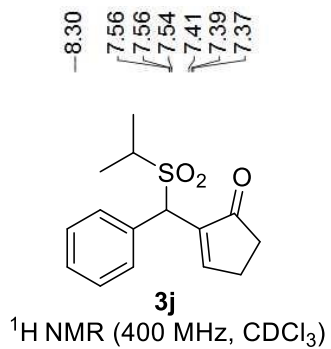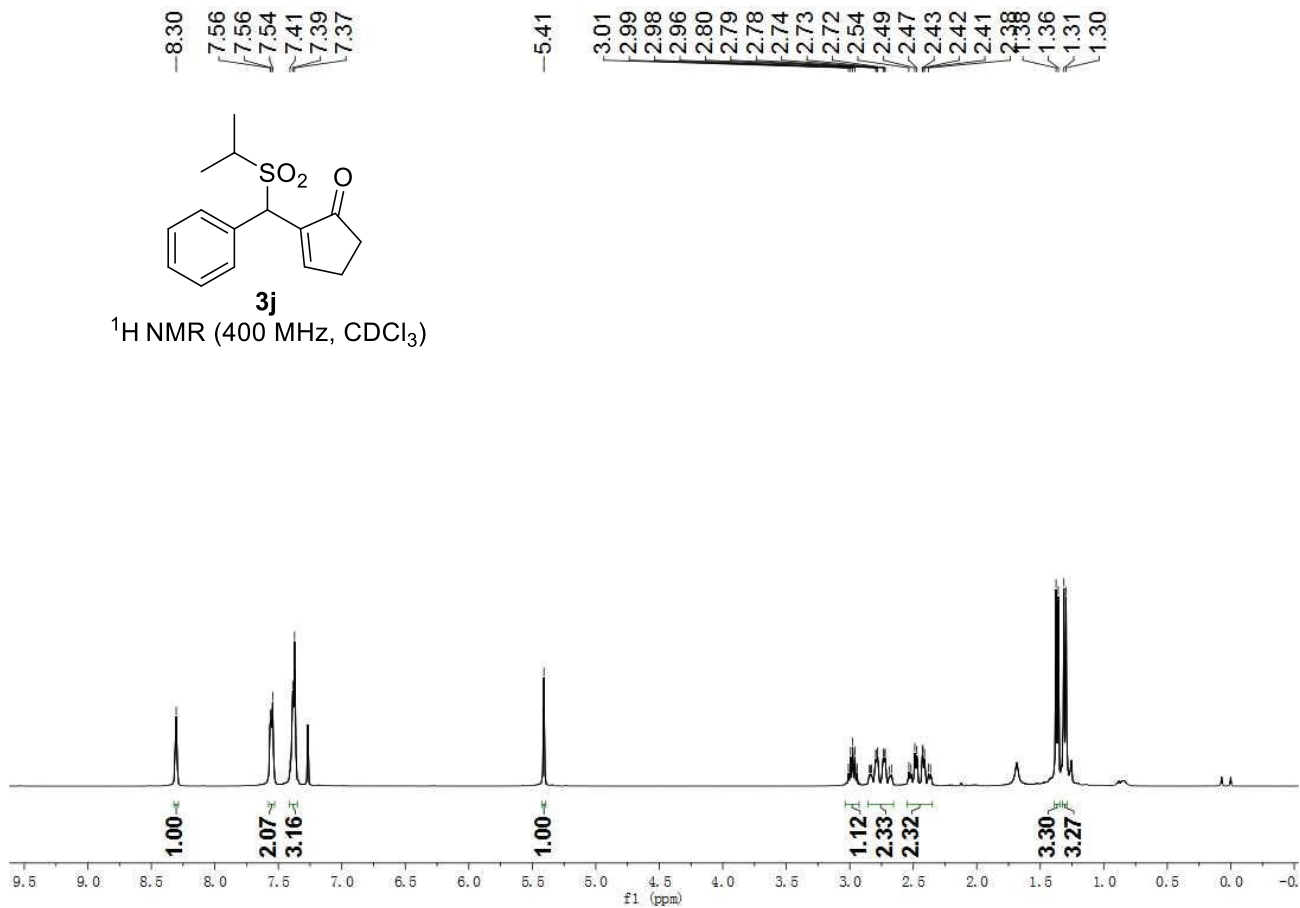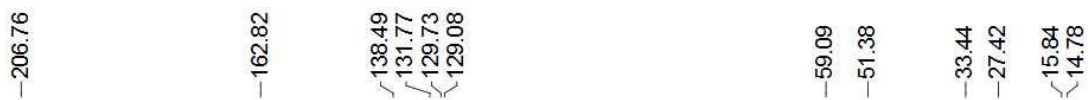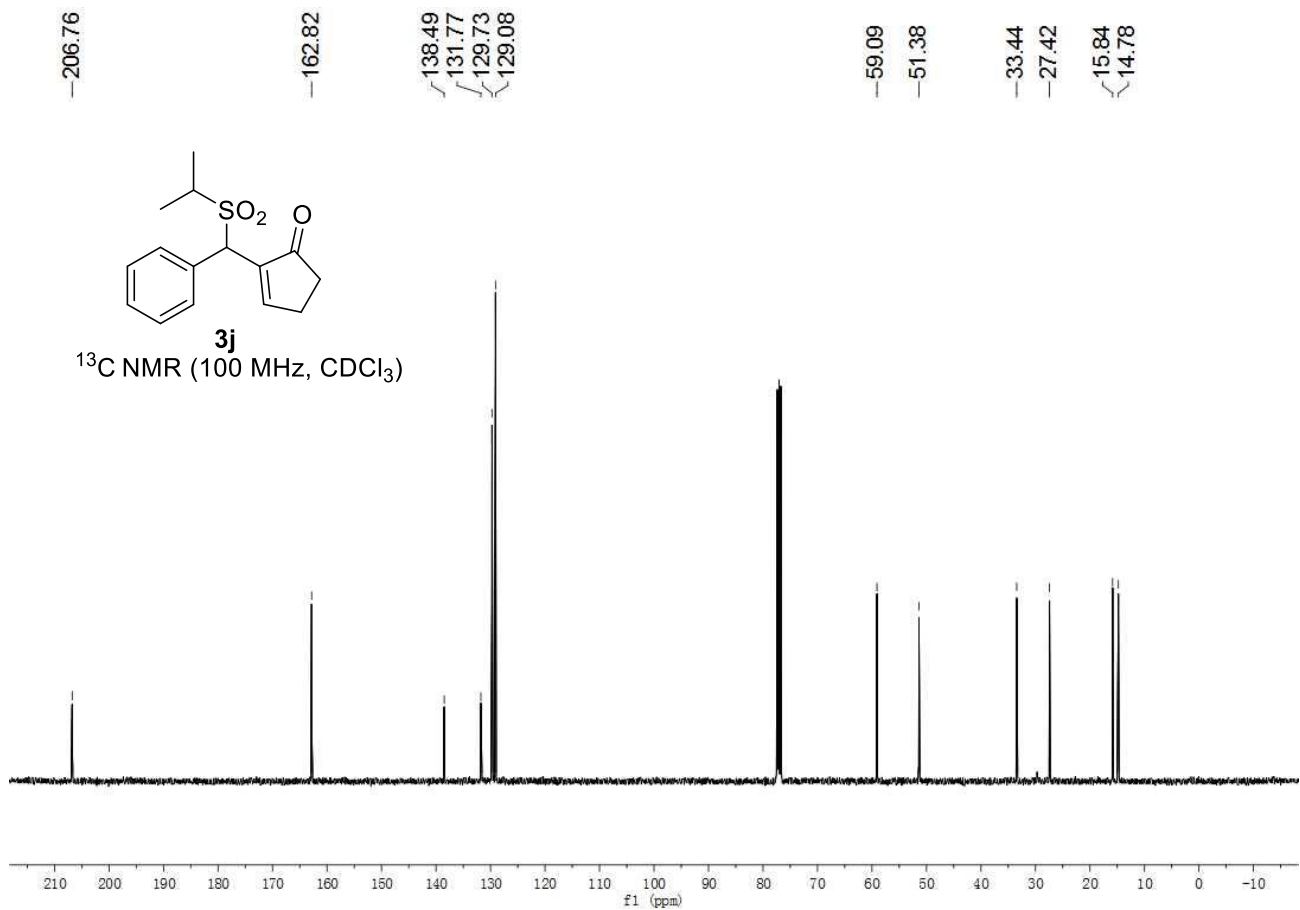

8.295  
7.552  
7.546  
7.533  
7.528  
7.397  
7.393  
7.385  
7.379  
7.371  
7.367  
5.420  
2.792  
2.783  
2.776  
2.732  
2.725  
2.716  
2.616  
2.609  
2.605  
2.598  
2.486  
2.480  
2.470  
2.464  
2.426  
2.420  
2.411  
2.404  
1.938  
1.927  
1.919  
1.909  
1.855  
1.842  
1.836  
1.832  
1.824  
1.813  
1.794  
1.786  
1.776  
1.768  
1.749  
1.731  
1.010  
0.991  
0.976

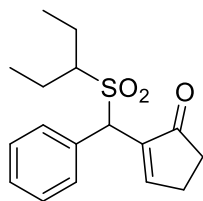

**3k**

$^1\text{H NMR}$  (400 MHz,  $\text{CDCl}_3$ )

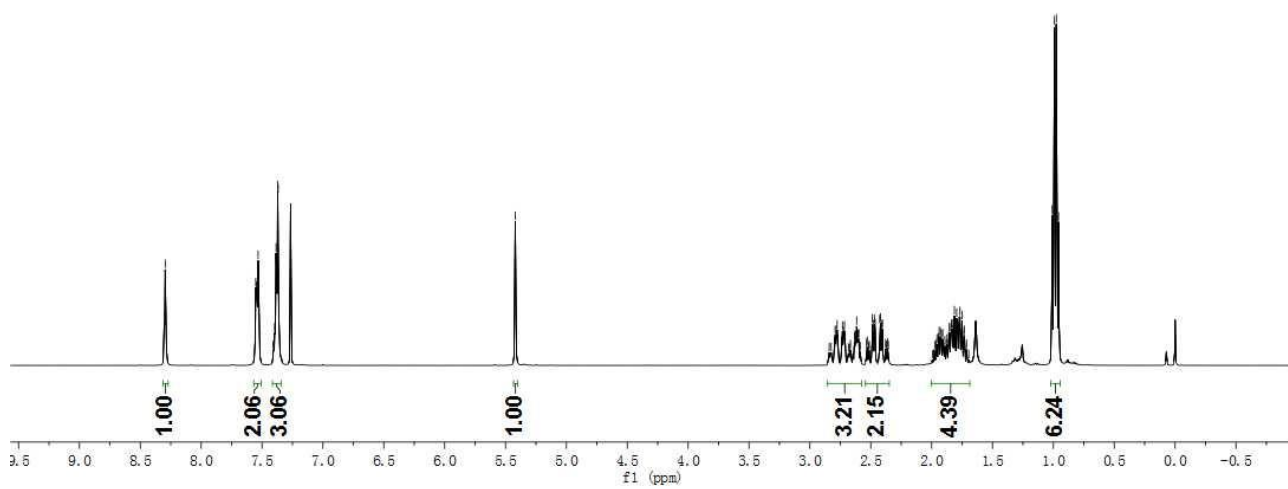

-206.79  
-162.67  
138.58  
132.01  
129.77  
129.04  
129.02  
62.45  
60.17  
33.42  
27.40  
20.37  
19.49  
10.88  
10.77

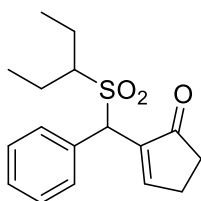

**3k**

$^{13}\text{C NMR}$  (100 MHz,  $\text{CDCl}_3$ )

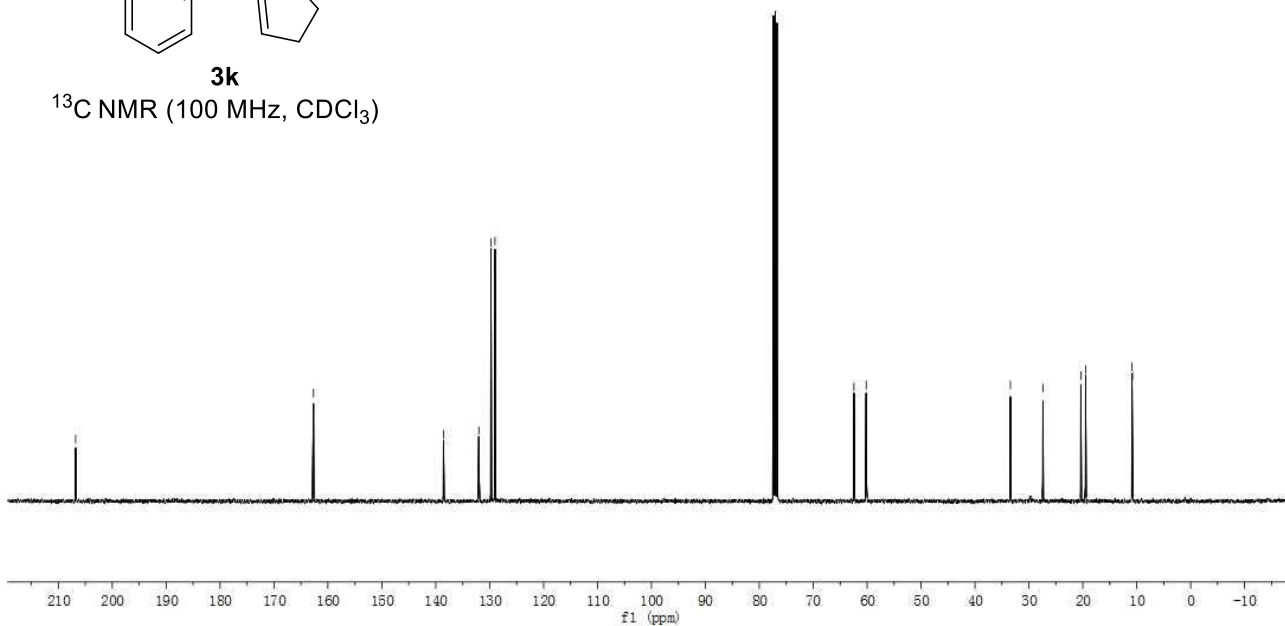

8.32  
8.31  
8.30  
8.29  
8.29  
8.28  
7.57  
7.56  
7.55  
7.54  
7.53  
7.52  
7.40  
7.39  
7.37  
7.37  
5.43  
5.42  
2.80  
2.79  
2.78  
2.78  
2.74  
2.73  
2.73  
2.72  
2.71  
2.70  
2.49  
2.48  
2.47  
2.47  
2.46  
2.42  
2.42  
2.42  
2.41  
1.59  
1.57  
1.56  
1.55  
1.36  
1.34  
1.30  
1.28  
0.98  
0.96  
0.96  
0.95  
0.94  
0.93

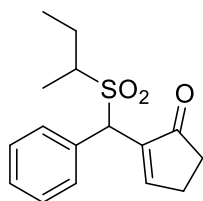

**3I**

$^1\text{H NMR}$  (400 MHz,  $\text{CDCl}_3$ )

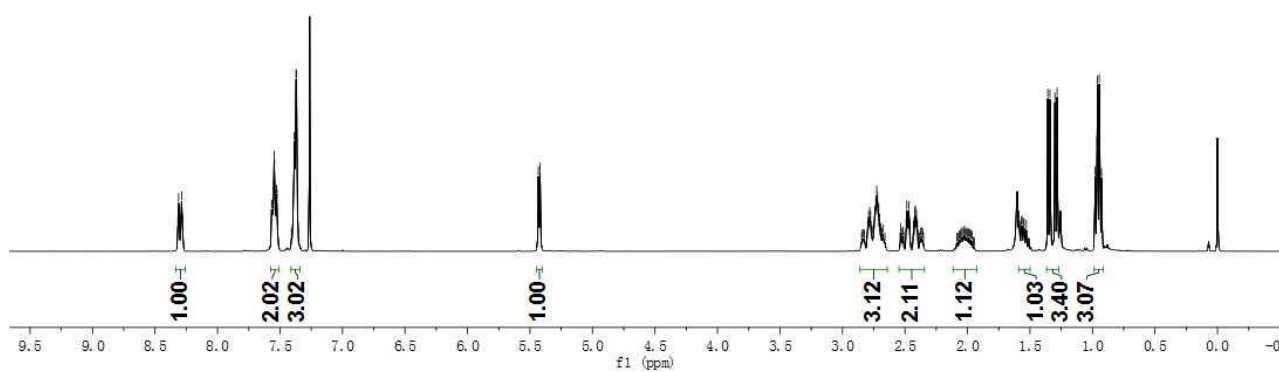

206.72  
206.70

162.77  
162.68  
138.63  
138.44  
132.08  
131.64  
129.86  
129.65  
129.09  
129.06  
129.05  
129.01

59.34  
59.30  
57.44  
57.28  
33.44  
33.41  
27.41  
27.39  
22.56  
21.52  
12.80  
11.67  
10.95  
10.87

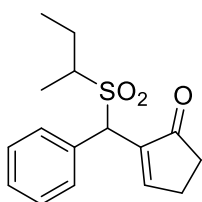

**3I**

$^{13}\text{C NMR}$  (100 MHz,  $\text{CDCl}_3$ )

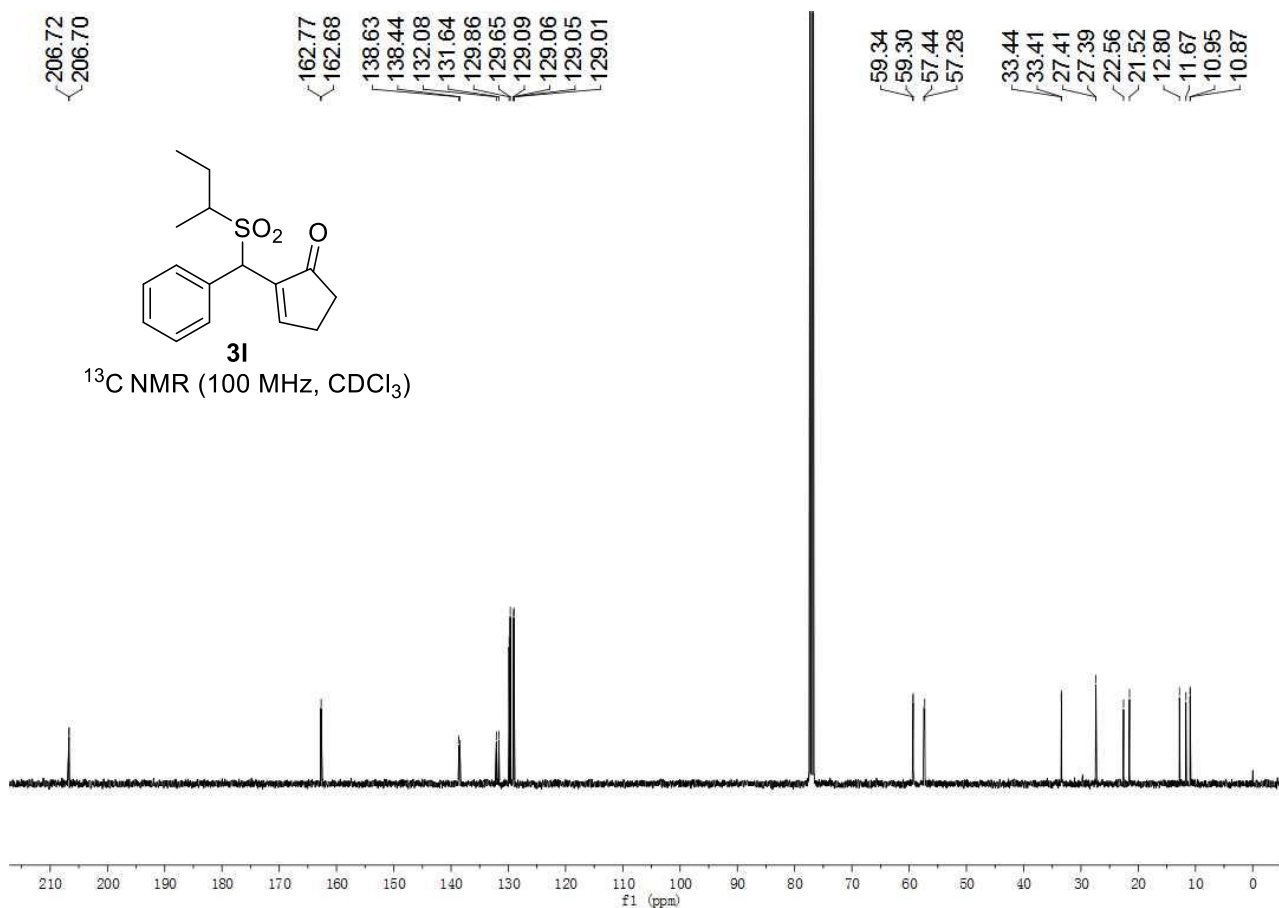

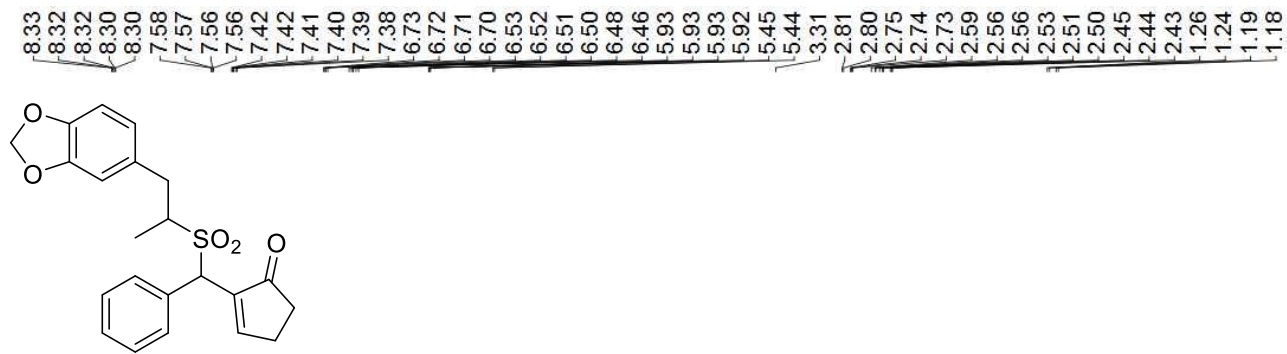

**3m**  
 $^1\text{H}$  NMR (400 MHz,  $\text{CDCl}_3$ )

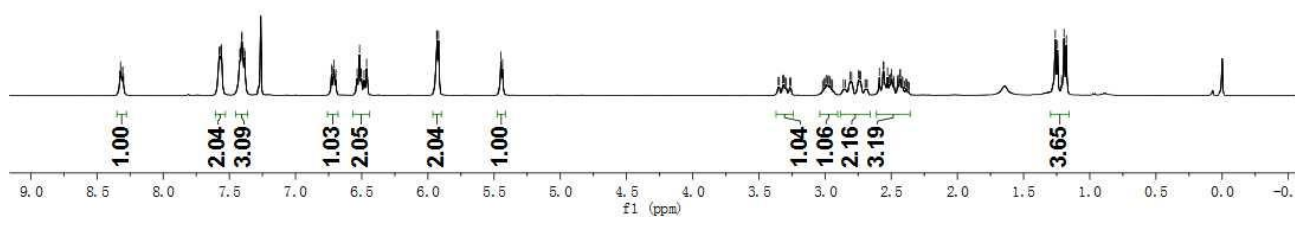

**3m**  
 $^{13}\text{C}$  NMR (100 MHz,  $\text{CDCl}_3$ )

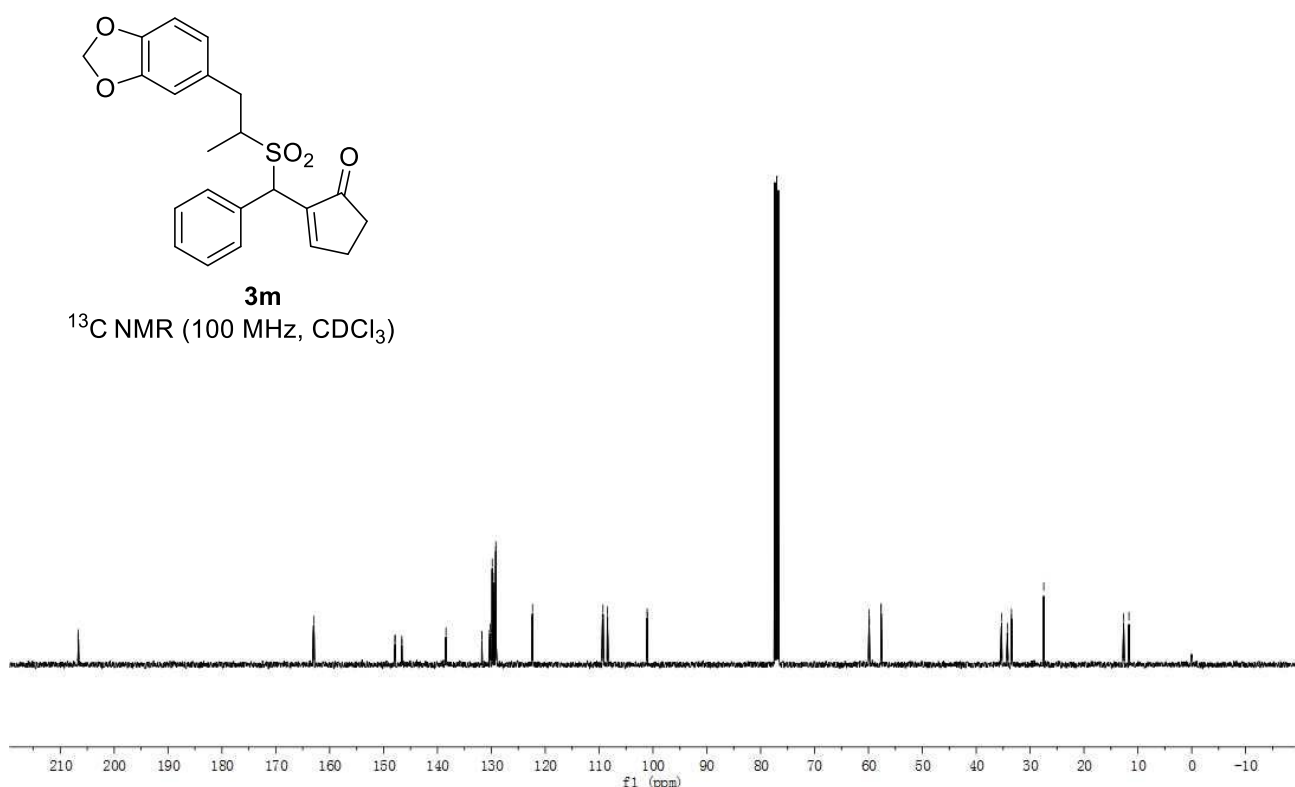

8.30  
7.55  
7.55  
7.53  
7.39  
7.37  
5.30  
3.20  
3.17  
3.15  
2.80  
2.79  
2.78  
2.74  
2.73  
2.72  
2.53  
2.49  
2.47  
2.43  
2.42  
2.41  
2.40  
2.38  
2.36  
2.16  
2.15  
2.13  
2.11  
2.09  
2.07  
2.05  
2.04  
2.02  
1.97  
1.95  
1.93  
1.92  
1.83  
1.82  
1.78  
1.75  
1.74  
1.62  
1.60  
1.59  
1.57  
1.56  
1.54  
1.53

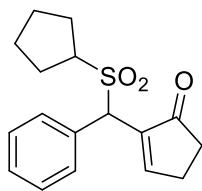

**3n**

<sup>1</sup>H NMR (400 MHz, CDCl<sub>3</sub>)

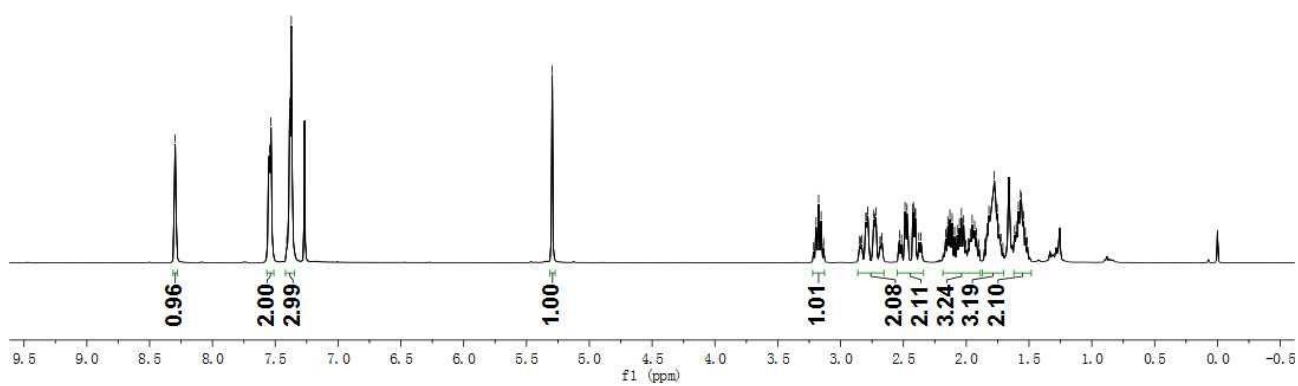

-206.84

-162.59

138.46

132.00

129.75

129.06

60.98

59.59

33.42

27.46

27.41

26.39

26.06

26.03

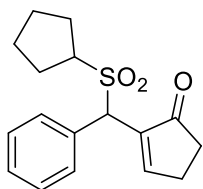

**3n**

<sup>13</sup>C NMR (100 MHz, CDCl<sub>3</sub>)

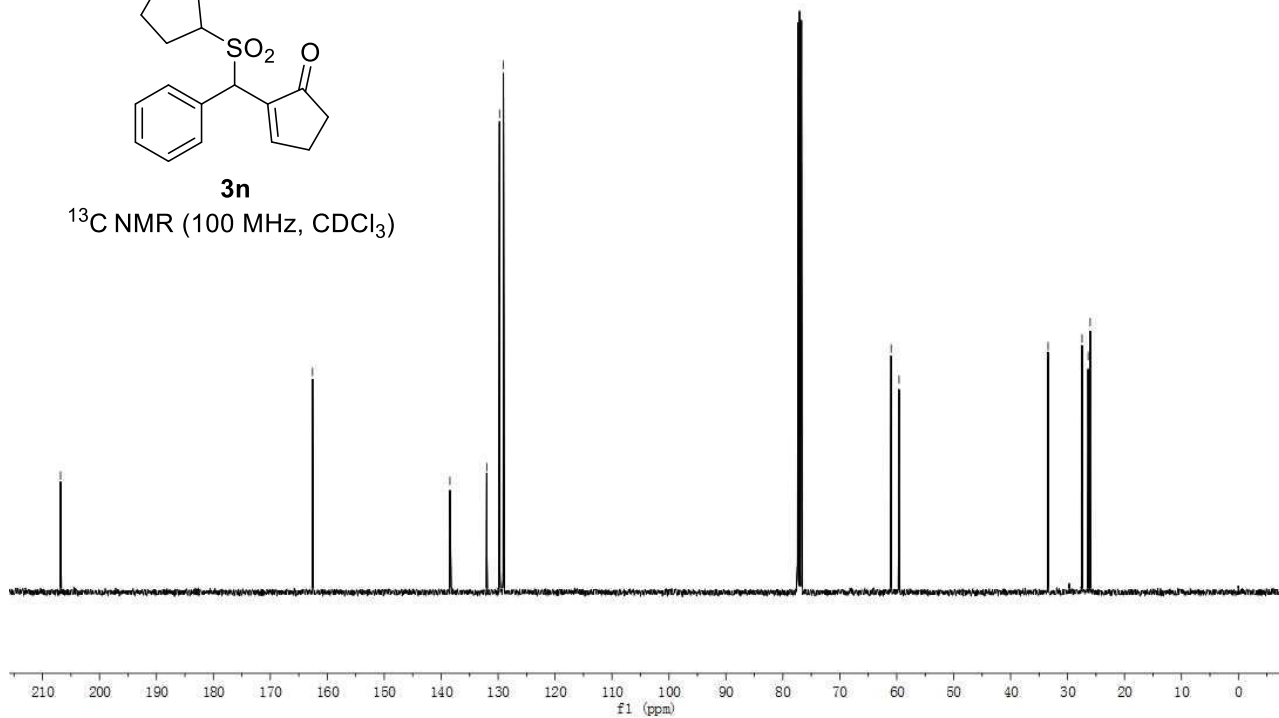

7.78  
7.77  
7.76  
7.57  
7.56  
7.55  
7.54  
7.39  
7.38  
7.37  
7.36  
7.35  
5.90  
2.71  
2.60  
2.59  
2.57  
2.57  
2.56  
2.55  
2.53  
2.50  
2.48  
2.47  
2.46  
2.45  
2.43  
2.13  
2.07  
2.06  
2.05  
2.05  
2.03  
2.02  
1.87  
1.86  
1.85  
1.85  
1.84  
1.63  
1.61  
1.59  
1.58  
1.56  
1.55  
1.54  
1.51  
1.15

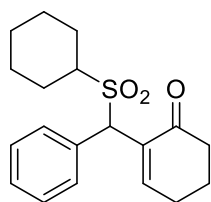

**3o**

<sup>1</sup>H NMR (400 MHz, CDCl<sub>3</sub>)

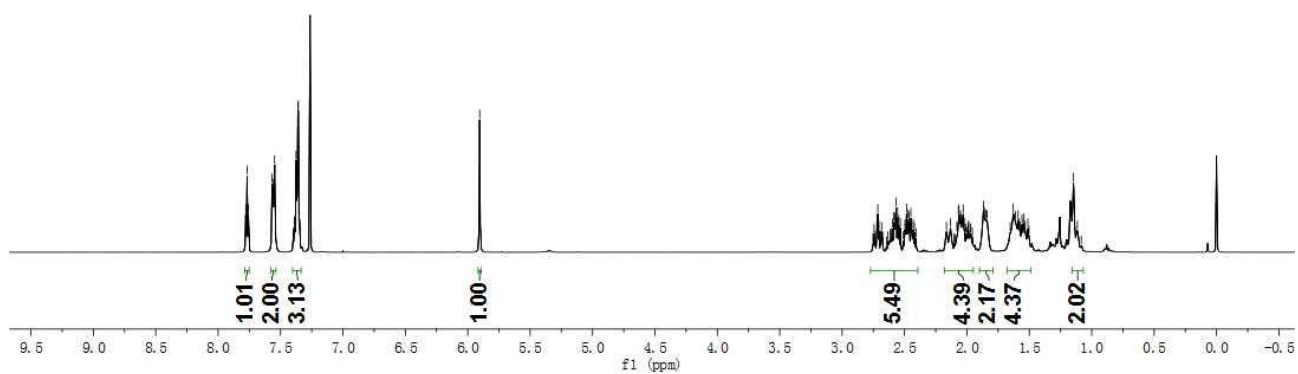

196.33  
151.09  
133.12  
132.65  
129.65  
128.98  
128.71  
59.63  
58.29  
37.83  
26.54  
25.71  
25.10  
25.02  
24.98  
24.20  
22.25

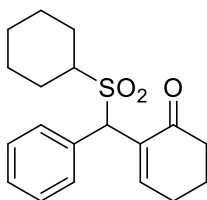

**3o**

<sup>13</sup>C NMR (100 MHz, CDCl<sub>3</sub>)

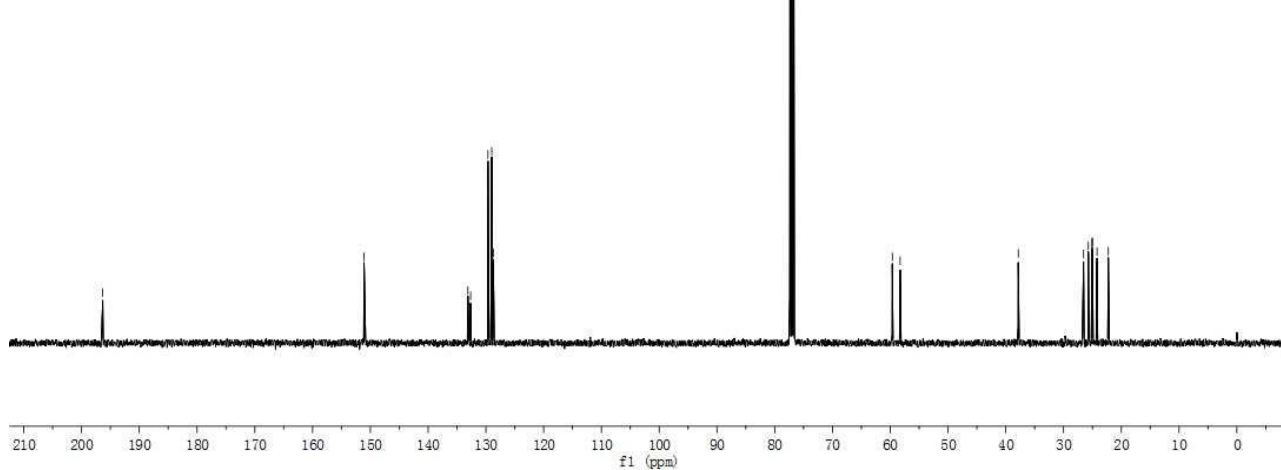



8.30  
8.29  
8.29  
7.56  
7.55  
7.54  
7.53  
7.41  
7.40  
7.39  
7.38  
7.37  
5.30  
2.90  
2.89  
2.89  
2.87  
2.85  
2.85  
2.83  
2.82  
2.81  
2.80  
2.79  
2.78  
2.76  
2.75  
2.74  
2.73  
2.73  
2.73  
2.55  
2.54  
2.52  
2.50  
2.49  
2.48  
2.48  
2.44  
2.44  
2.43  
2.42  
2.42  
2.39  
2.38  
2.37  
1.35  
1.33  
1.32

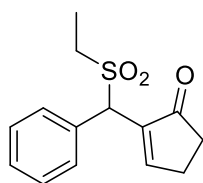

**3p**

$^1\text{H NMR}$  (400 MHz,  $\text{CDCl}_3$ )

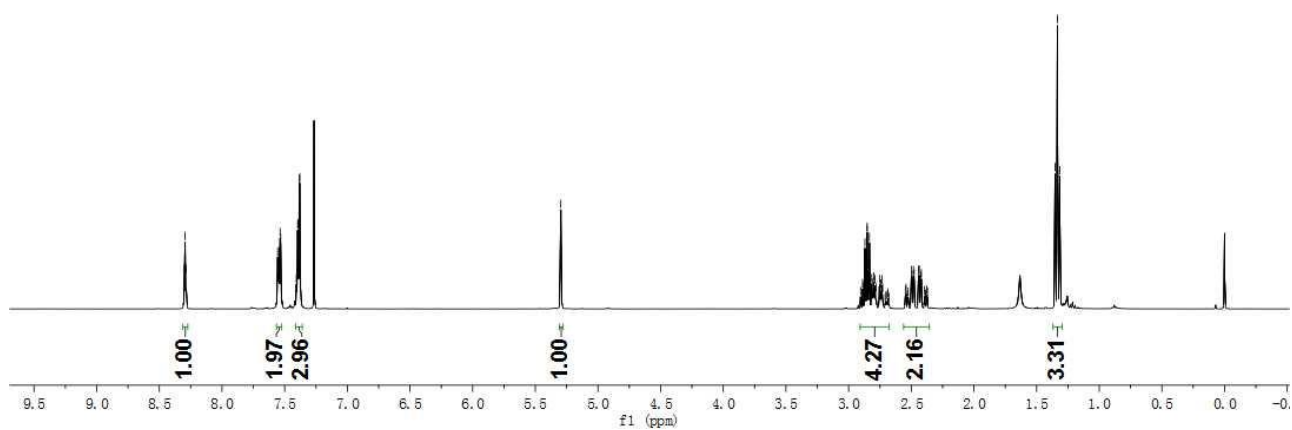

-206.78

-162.77

138.31

131.64

129.70

129.23

129.13

-61.62

-46.10

-33.44

-27.44

-6.48

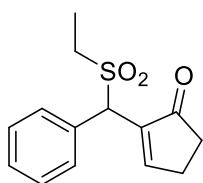

**3p**

$^{13}\text{C NMR}$  (100 MHz,  $\text{CDCl}_3$ )

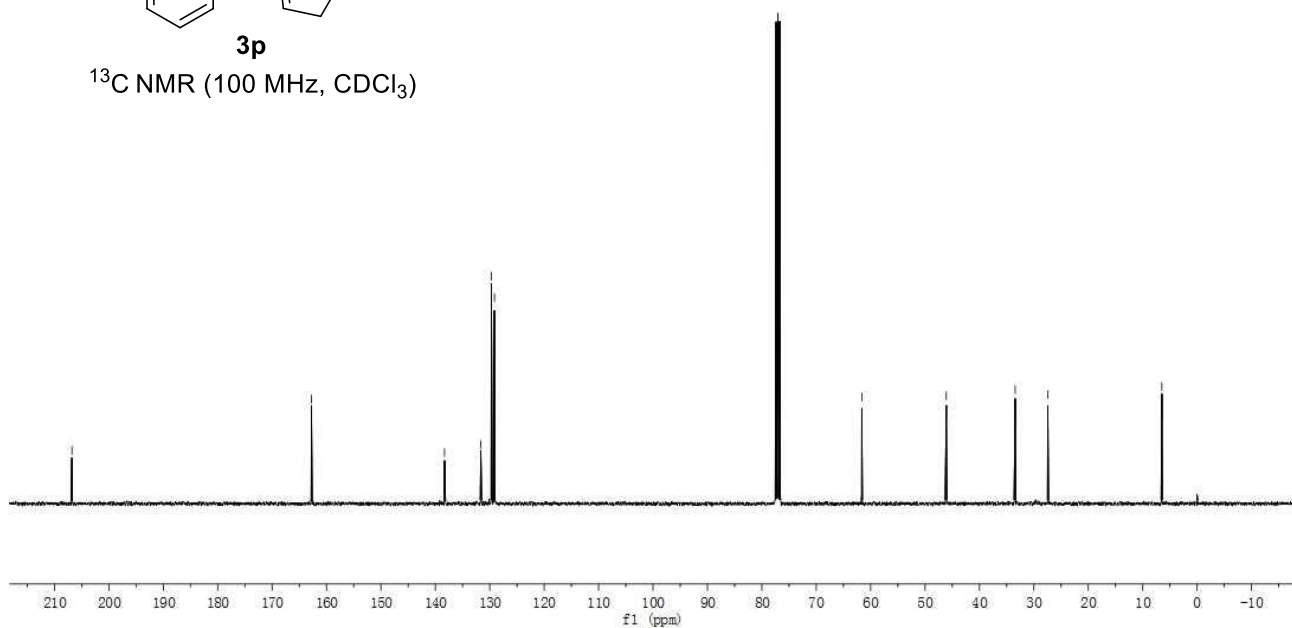

8.29 8.29 8.28 8.28 7.55 7.55 7.54 7.54 7.53 7.53 7.51 7.51 7.41 7.41 7.40 7.40 7.39 7.39 7.38 7.38 5.28 5.28 2.84 2.84 2.82 2.82 2.81 2.81 2.80 2.80 2.79 2.79 2.78 2.78 2.77 2.77 2.75 2.75 2.74 2.74 2.73 2.73 2.50 2.50 2.49 2.49 2.48 2.48 2.47 2.47 2.44 2.44 2.43 2.43 2.42 2.42 2.42 2.42 1.80 1.80 1.79 1.79 1.78 1.78 1.78 1.78 1.77 1.77 1.77 1.77 1.75 1.75 1.40 1.40 1.38 1.38 1.36 1.36 1.34 1.34 0.91 0.91 0.89 0.89 0.87 0.87

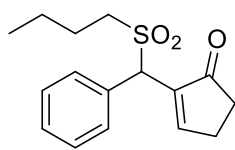

**3q**

$^1\text{H NMR}$  (400 MHz,  $\text{CDCl}_3$ )

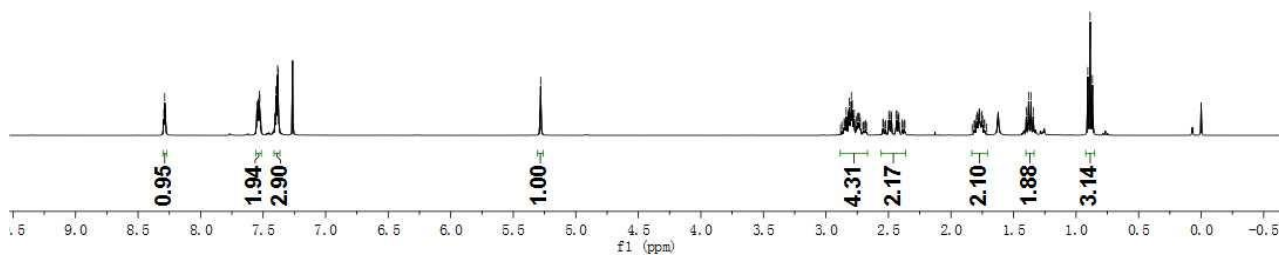

206.79 162.71 138.34 131.72 129.70 129.21 129.11 62.23 51.37 33.44 27.43 23.76 21.68 13.49

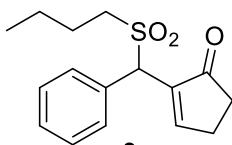

**3q**

$^{13}\text{C NMR}$  (100 MHz,  $\text{CDCl}_3$ )

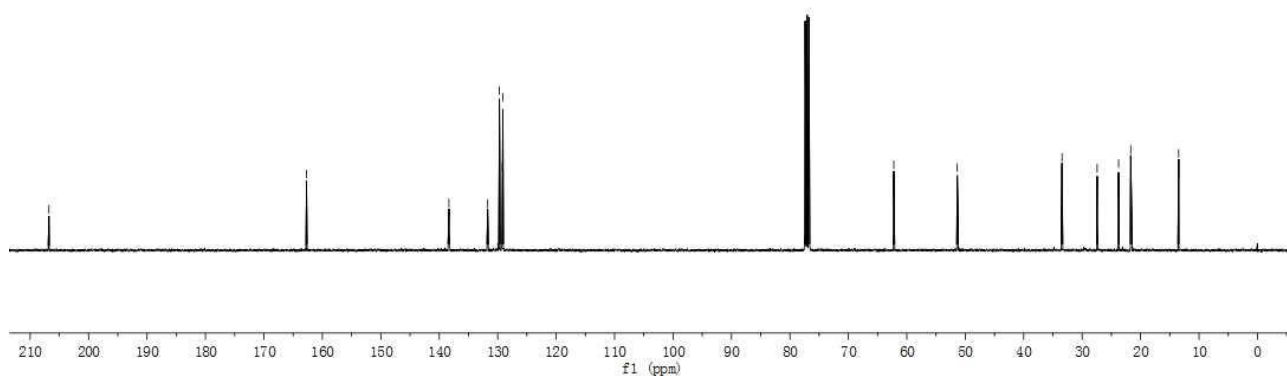

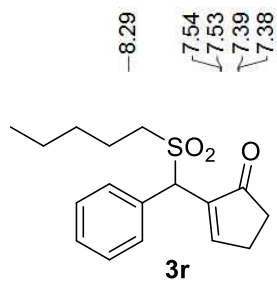

$^1\text{H NMR}$  (400 MHz,  $\text{CDCl}_3$ )

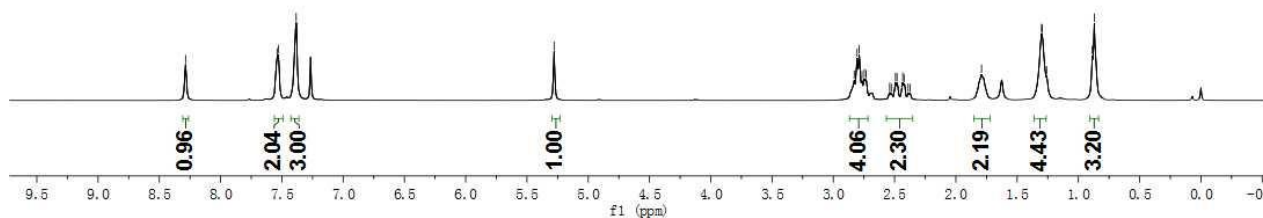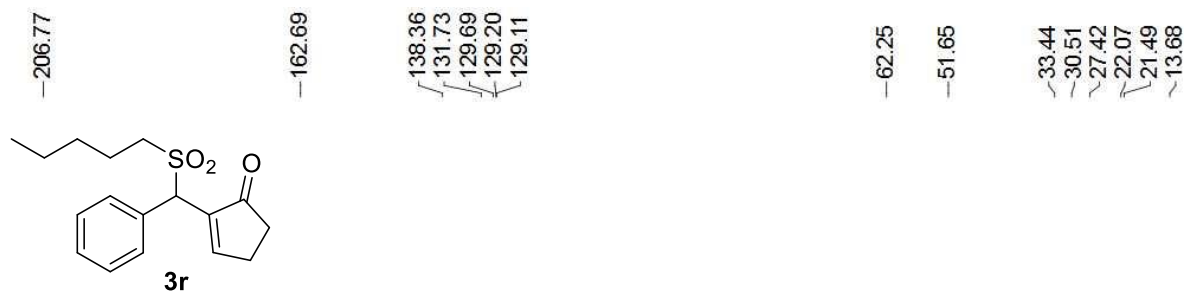

$^{13}\text{C NMR}$  (100 MHz,  $\text{CDCl}_3$ )

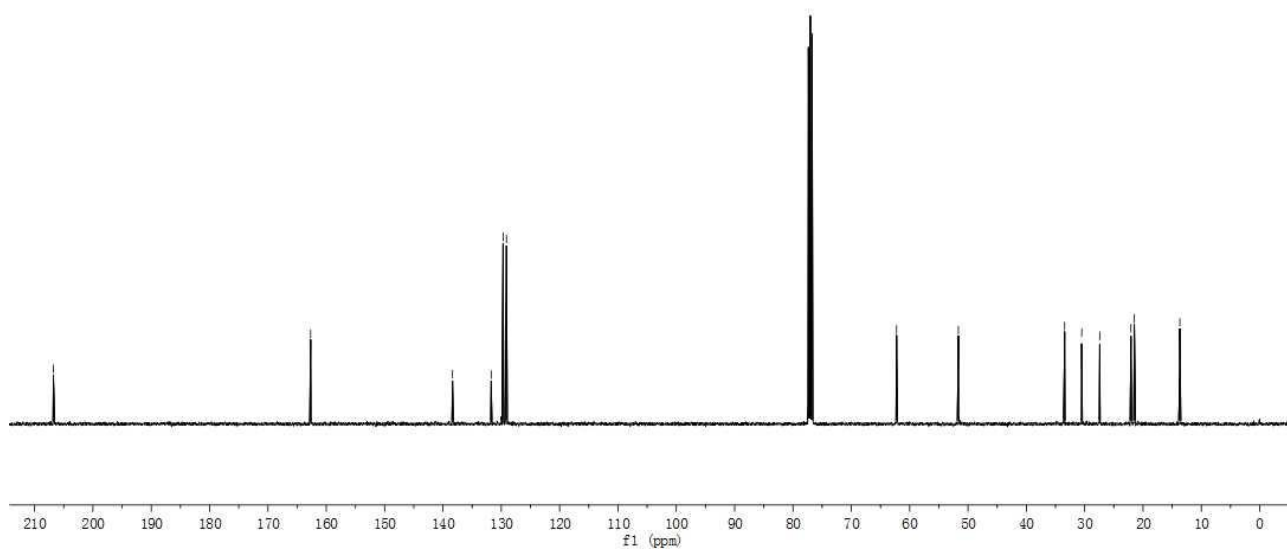

8.27  
8.26  
8.25  
7.60  
7.59  
7.58  
7.57  
7.39  
7.38  
7.38  
7.37  
7.36  
7.36  
7.35  
7.35  
7.34  
7.34  
5.50  
2.76  
2.76  
2.75  
2.74  
2.73  
2.71  
2.70  
2.69  
2.69  
2.68  
2.68  
2.63  
2.52  
2.52  
2.50  
2.50  
2.47  
2.47  
2.46  
2.45  
2.42  
2.41  
2.40  
2.40  
2.39  
2.37  
2.36  
2.35  
2.35  
1.29

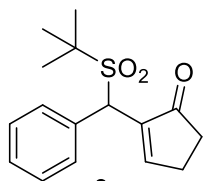

**3s**

$^1\text{H NMR}$  (400 MHz,  $\text{CDCl}_3$ )

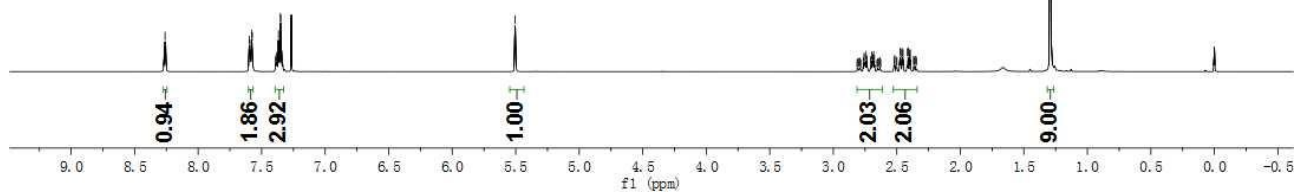

206.57  
162.52  
139.81  
133.24  
129.76  
128.96  
128.88  
62.74  
58.00  
33.42  
27.33  
24.42

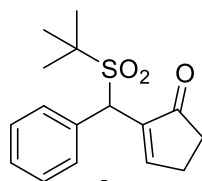

**3s**

$^{13}\text{C NMR}$  (100 MHz,  $\text{CDCl}_3$ )

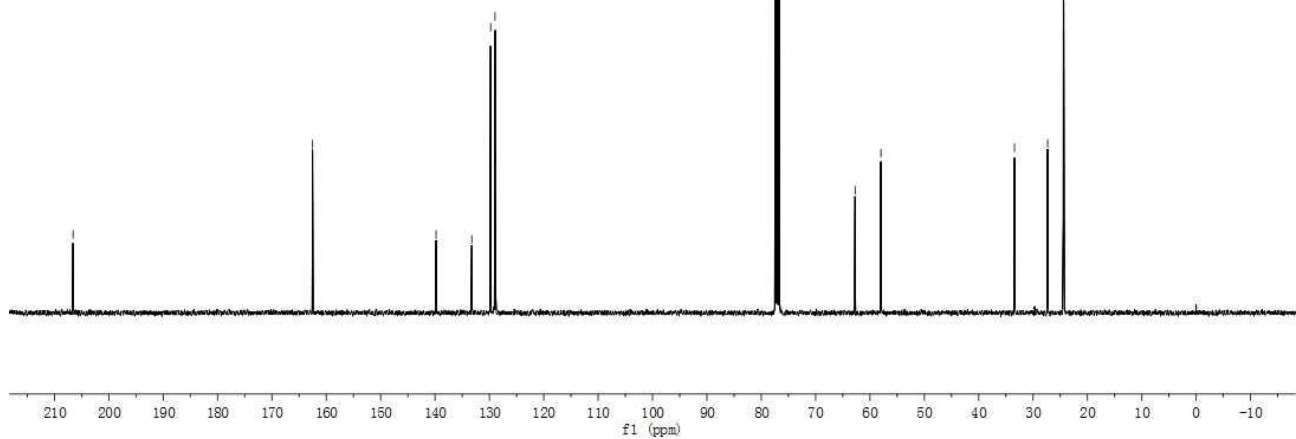

8.29 8.29 8.28 8.28 7.53 7.52 7.51 7.51 7.40 7.39 7.38 7.31 7.29 7.28 7.26 7.26 7.23 7.23 7.15 7.15 7.13 7.11 5.30 3.13 3.12 3.11 3.10 3.09 3.08 3.08 3.07 3.06 3.05 3.04 3.03 2.81 2.80 2.79 2.75 2.75 2.74 2.55 2.55 2.50 2.50 2.49 2.48 2.48 2.45 2.44 2.43 2.42 2.40 2.39

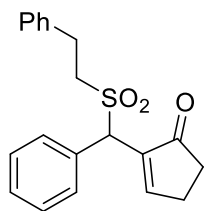

**3t**

<sup>1</sup>H NMR (400 MHz, CDCl<sub>3</sub>)

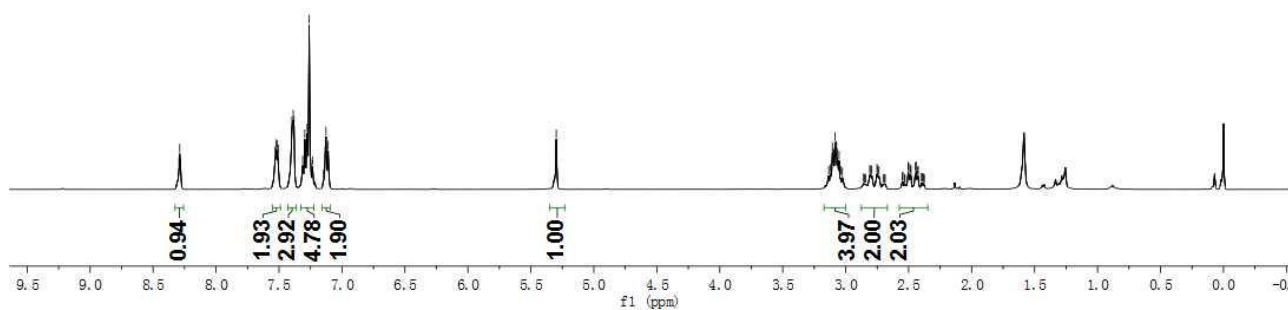

206.70 162.87 138.22 137.52 131.50 129.72 129.33 129.18 128.90 128.48 127.05 62.69 53.16 33.44 28.08 27.46

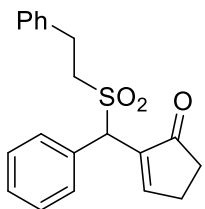

**3t**

<sup>13</sup>C NMR (100 MHz, CDCl<sub>3</sub>)

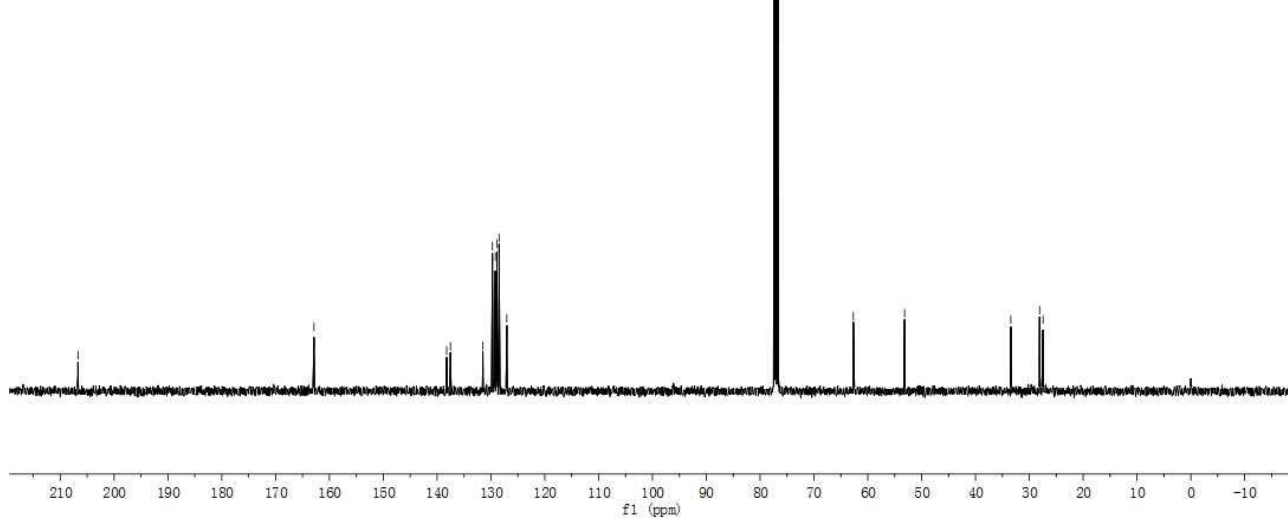

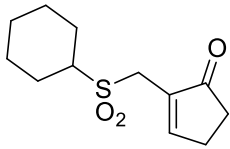

**3u**

<sup>1</sup>H NMR (400 MHz, CDCl<sub>3</sub>)

7.98

3.87 3.87 2.77 2.77 2.76 2.75 2.75 2.50 2.50 2.49 2.49 2.48 2.22 2.19 1.94 1.91 1.56 1.56 1.53 1.53 1.26 1.25 1.24

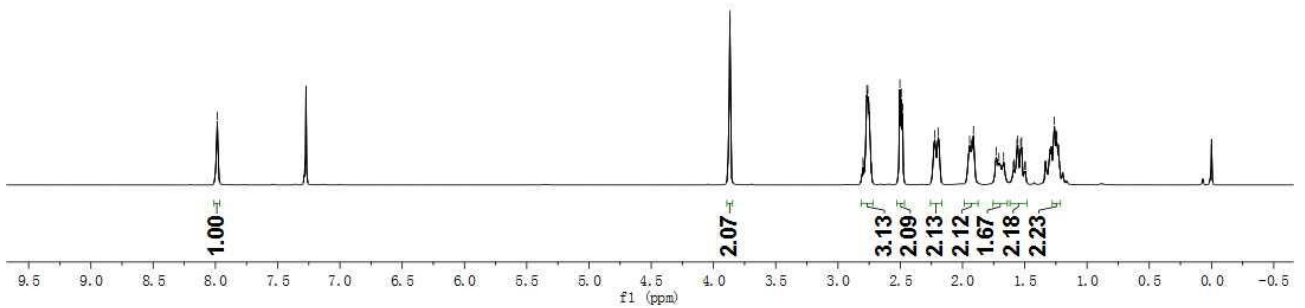

207.28

165.84

133.83

61.11

44.91

33.75

27.45

25.06

25.03

25.01

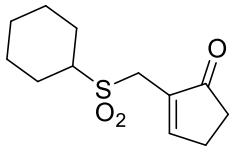

**3u**

<sup>13</sup>C NMR (100 MHz, CDCl<sub>3</sub>)

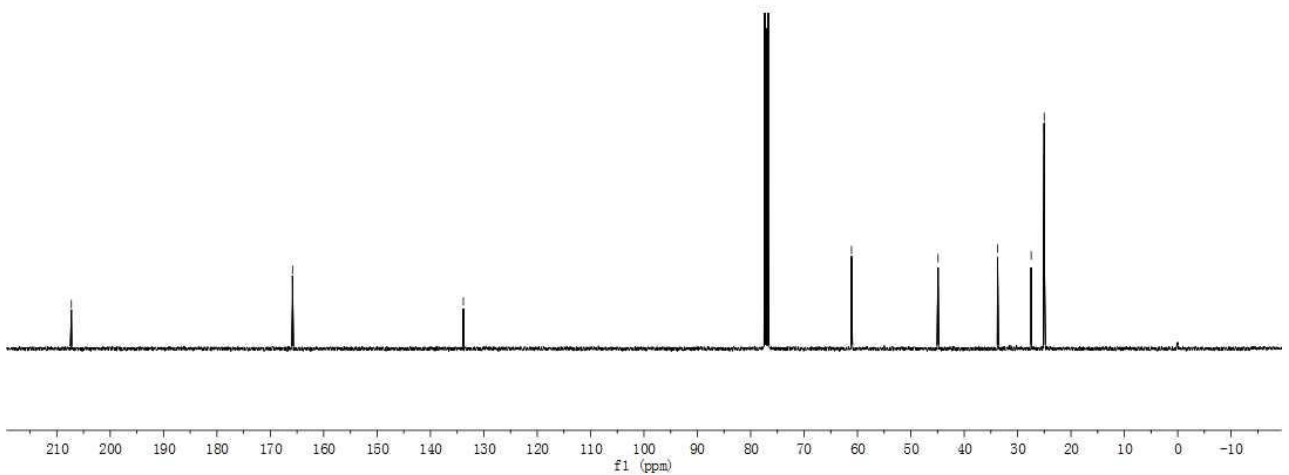

7.85  
7.84  
7.83  
7.82  
7.48  
7.47  
7.46  
7.45  
7.44  
7.35

3.92  
3.07  
3.05  
3.04  
3.03  
3.01  
2.25  
2.22  
2.00  
1.99  
1.98  
1.96  
1.65  
1.63  
1.62  
1.38  
1.35  
1.34  
1.31  
1.31  
1.27

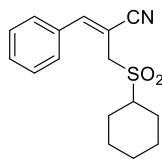

5

<sup>1</sup>H NMR (400 MHz, CDCl<sub>3</sub>)

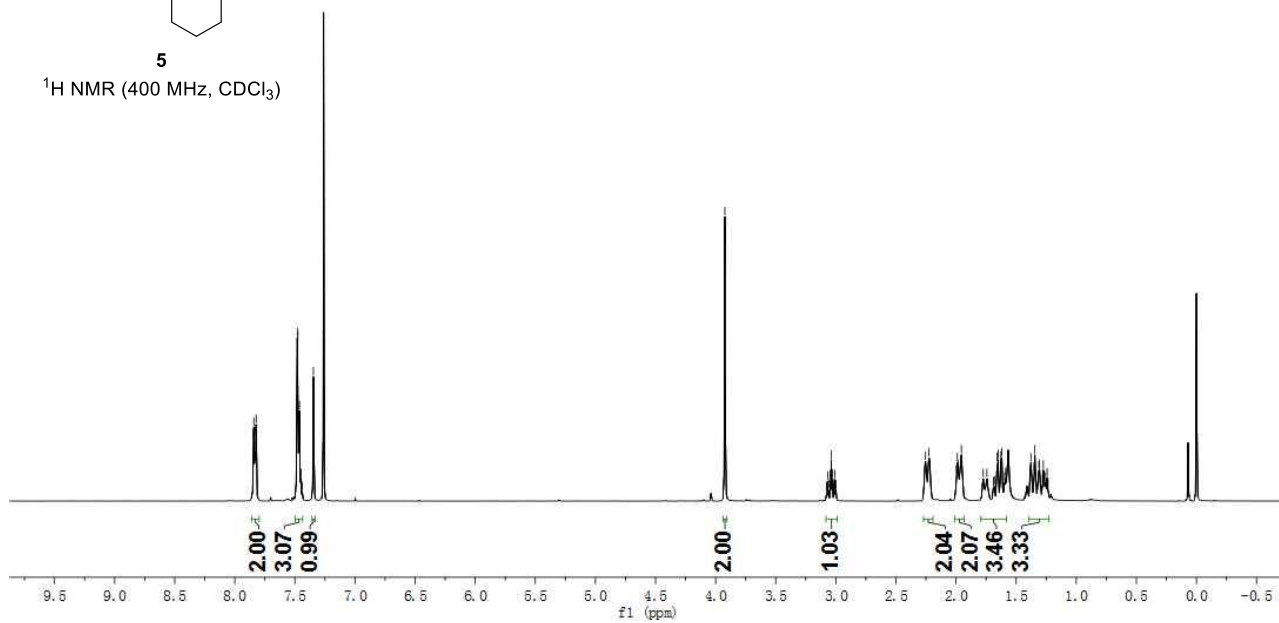

-152.36

132.54  
131.73  
129.47  
129.08

-117.79

-97.13

-60.93

-54.92

25.05  
24.97

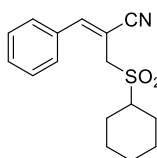

5

<sup>13</sup>C NMR (100 MHz, CDCl<sub>3</sub>)

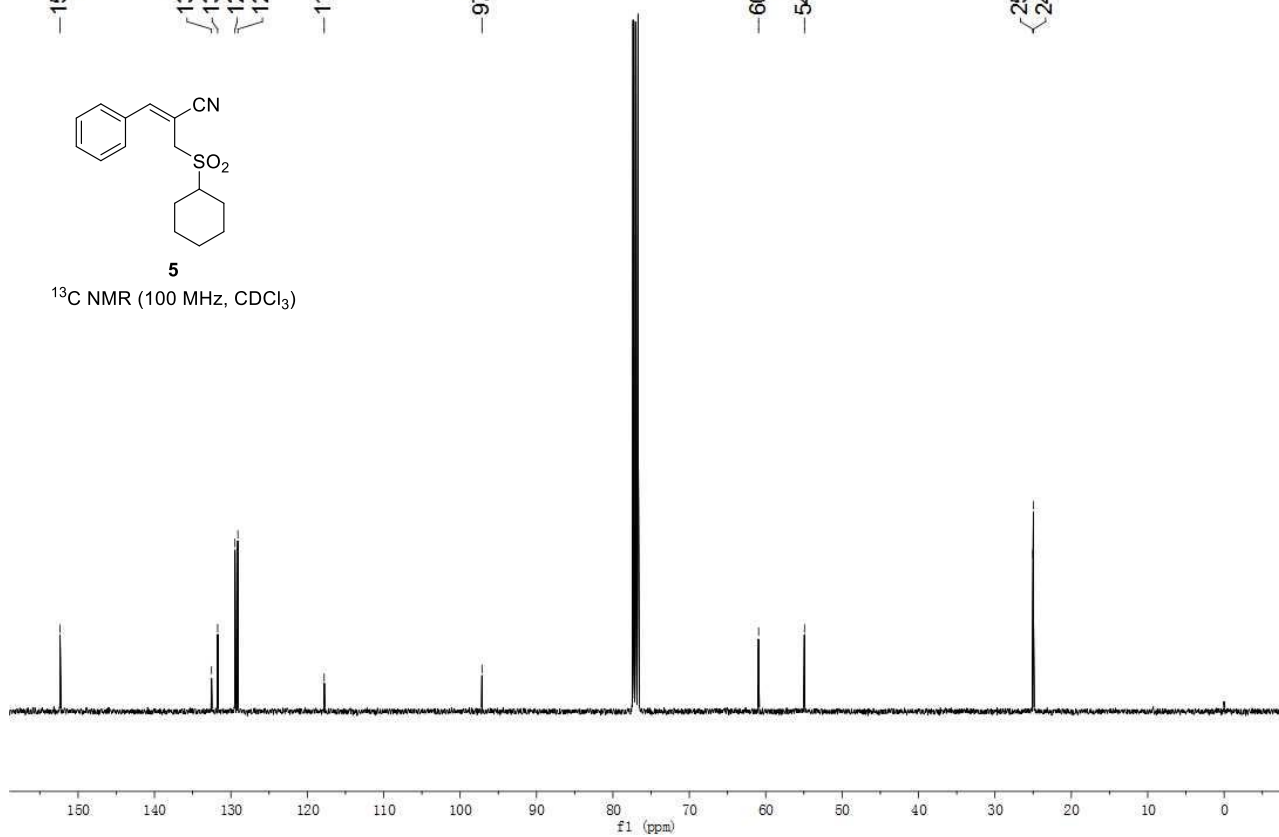

Supplement: d1qo00344e1.pdf [file d1qo00344e1.pdf]
